# Supplementary material for: Desymmetrization in geometry optimization: application to an ab initio study of copper(I) hydration
Source: publisher site journal article supplement (doi:10.1515/pac-2019-1118), 2020-07-13
Supplement: Supplementary file 1 [file j_pac-2019-1118_suppl_001.docx]

**Supplementary Material to:**

**Desymmetrization in Geometry Optimization: Application to an ab initio study of copper(I) hydration.**

Cory C. Pye*, Daniel C. M. Whynot, Christopher R. Corbeil, and Darren J. Mercer

Department of Chemistry, Saint Mary's University, 923 Robie Street, Halifax, NS Canada B3H 3C3

**Table S2.** Total Energies

Bold indicates a local minimum on the potential energy surface

|  | HF/STO-3G | HF/3-21G |
| --- | --- | --- |
| Cu+ *Kh**[[1]](#footnote-1)* | -1620.0889276 (d8s2) | -1630.4158906 (d8s2) |
| Cu+ *Kh**[[2]](#footnote-2)* | -1620.0889276 (d8s2) | -1630.4175773 (d8s2) |
| Cu+ *Kh* UHF | -1620.2204868 (d8s2) | -1630.5209328 |
| Cu+ *Kh* |  | -1630.5609488 |
| Cu+ *Kh* |  | -1630.6760974 (d9s1) |
| Cu+ *Kh* | -1619.4310521 (d8s2) *[[3]](#footnote-3)* | -1630.5365768*[[4]](#footnote-4)* |
| Cu+ *Kh* | -1620.2028767 | -1630.6760969 (d9s1) |
| Cu+ *Kh* | -1620.2204868 |  |
| Cu+ *Kh**[[5]](#footnote-5)* |  | -1630.5361396 |
| H2O *C2v* | -74.9659012 | -75.5859598 |
| Cu(H2O)1+ *C2v* | -1695.15737631 | -1706.0699834 |
| Cu(H2O)1+ *C2v* | -1695.28625002 | -1706.3590148 |
| Cu(H2O)1+ *C2v* trip | -1695.34951852 | -1706.3638341 |
| Cu(H2O)2+ *D2d* |  | -1781.9828761 |
| Cu(H2O)2+ *D2d* | -1770.3076172 | -1782.0139252 |
| Cu(H2O)2+ *D2d* trip | -1770.3283674 | -1781.9915374 |
| Cu(H2O)2+ *D2h* | -1770.11974251 | -1781.6724591 |
| Cu(H2O)2+ *D2h* | -1770.31648002 | -1782.01305432 |
| Cu(H2O)2+ *D2h* trip | -1770.33005552 | -1781.99102932 |
| Cu(H2O)2+ *D2h* |  | -1781.9816561 |
| Cu(H2O)2+ *C2* | -1770.1980313 | *D2d* |
| Cu(H2O)3+ *D3h* *#1* | -1845.1253561 | -1857.5938777 |
| Cu(H2O)3+ *D3h* *#1* | -1845.2853917 | -1857.6441758 |
| Cu(H2O)3+ *D3h* *#1* trip | -1845.2900154 |  |
| Cu(H2O)3+ *D3* |  | -1857.6429549 |
| Cu(H2O)3+ *C3* | -1845.2522195 |  |

**Table S2** (continued)

|  | HF/6-31G* | HF/6-31+G* | HF/6-311+G* |
| --- | --- | --- | --- |
| Cu+ *Kh[[6]](#footnote-6)* | -1638.0417719 (d8s2) | -1638.0539765 (d8s2) |  |
| Cu+ *Kh[[7]](#footnote-7)* | -1638.0417719 (d8s2) |  |  |
| Cu+ *Kh* UHF | -1638.3528406 (d10) | -1638.4550683 (d10) | -1638.6050297 |
| Cu+ *Kh[[8]](#footnote-8)* | -1638.3528179 |  |  |
| Cu+ *Kh[[9]](#footnote-9)* | -1638.3528375 |  |  |
| H2O *C2v* | -76.0107465 | -76.0177432 | -76.0377596 |
| Cu(H2O)1+ *C2v* | -1714.0943797 | -1714.1100484 |  |
| Cu(H2O)1+ *C2v* | -1714.4481785 |  |  |
| Cu(H2O)1+ *C2v* trip | -1714.4517988 |  |  |
| Cu(H2O)1+ *C2v* | **-1714.4352078** | **-1714.5257795** | **-1714.6974194** |
| Cu(H2O)2+ *D2d* | **-1790.5133812** | **-1790.5926622** | **-1790.7861053** |
| Cu(H2O)2+ *D2d* | -1790.5130447 |  |  |
| Cu(H2O)2+ *D2d* trip | -1790.4859411 |  |  |
| Cu(H2O)2+ *D2h* | -1790.1205655 | -1790.5924528 | -1790.7858599 |
| Cu(H2O)2+ *D2h* | as below |  |  |
| Cu(H2O)2+ *D2h* trip | -1790.48576622 |  |  |
| Cu(H2O)2+ *D2h* | -1790.5128478 |  |  |
| Cu(H2O)2+ *C2* | *D2d* |  |  |
| Cu(H2O)3+ *D3h* *#1* | -1866.5572082 | -1866.6370539 | -1866.8523345 |
| Cu(H2O)3+ *D3h* *#1* | as above |  |  |
| Cu(H2O)3+ *D3h* *#2* | -1866.5600049 | -1866.6381871 | -1866.8536506 |
| Cu(H2O)3+ *D3* | **-1866.5604907** | **-1866.6390152** | **-1866.8545075** |
| Cu(H2O)3+ *C2v* *#1* | -1866.5592836 | -1866.6384340 | -1866.8538656 |
| Cu(H2O)3+ *C2v* *#2* | -1866.5602928 | -1866.6388772 | -1866.8543535 |
| Cu(H2O)3+ *Cs* [2+1] | **-1866.5516635** | **-1866.6352103** | **-1866.8506182** |

**Table S2** (continued)

|  | MP2/6-31G* | MP2/6-31+G* | MP2/6-311+G* |
| --- | --- | --- | --- |
| Cu+ *Kh1* | -1638.2003534 | -1638.2293274 |  |
| Cu+ *Kh2* | -1638.5962821 | -1638.7476775 | -1638.9805098 |
| H2O *C2v* | -76.1968478 | -76.2097766 | -76.2447096 |
| Cu(H2O)1+ *C2v* | -1714.4539231 | -1714.4939661 |  |
| Cu(H2O)1+ *C2v* | **-1714.8919169** | **-1715.0259546** | **-1715.2950037** |
| Cu(H2O)2+ *D2d* | -1791.1875576 | -1791.3088825 | **-1791.6141676** |
| Cu(H2O)2+ *D2h* | -1791.1862467 | -1791.3082031 | -1791.6132660 |
| Cu(H2O)2+ *Cs* | -1791.1875579 | -1791.3089053 | N/A |
| Cu(H2O)2+ *C2* | -**1791.1875582** | **-1791.3089283** | N/A |
| Cu(H2O)3+ *D3h* *#1* | -1867.4109305 | -1867.5399440 | -1867.8829050 |
| Cu(H2O)3+ *D3h* *#2* | -1867.4174132 | -1867.5425509 | -1867.8852858 |
| Cu(H2O)3+ *D3* | -1867.4175633 | -1867.5433761 | -1866.8472983 |
| Cu(H2O)3+ *C2v* *#1* | -1867.4153825 | -1867.5444636 | -1867.7985414 |
| Cu(H2O)3+ *C2v* *#2* | -1867.4202747 | -1867.5457892 | -1867.8880149 |
| Cu(H2O)3+ *C2* | -1867.4204003 | -1867.5461562 | -1867.8880240 |
| Cu(H2O)3+ *C2* | -1867.4188026 | -1867.5449075 | N/A |
| Cu(H2O)3+ *Cs* *#1* | -1867.4203488 | -1867.5458720 | N/A |
| Cu(H2O)3+ *Cs* *#2* | -1867.4203323 | -1867.5459834 | **-1867.8881271** |
| Cu(H2O)3+ *C1* | **-1867.4204048** | **-1867.5463595** | N/A |
| Cu(H2O)3+ *Cs* [2+1] | -1867.4191658 | -1867.5509265 | **-1867.8931784** |
| Cu(H2O)3+ *C1* [2+1] | **-1867.4191715** | **-1867.5509392** | N/A |

|  | B3LYP/6-31G* | B3LYP/6-31+G* | B3LYP/6-311+G* |
| --- | --- | --- | --- |
| Cu+ *Kh* | -1639.860885 | -1640.0169542 | -1640.1769055 |
| H2O *C2v* | -76.4089533 | -76.4225722 | -76.443809 |
| Cu(H2O)1 *C2v* | **-1716.3911201** | **-1716.5104134** | **-1716.6923639** |
| Cu(H2O)2 *D2d* | -1792.8990982 | -1793.0035421 | **-1793.2079951** |
| Cu(H2O)2 *D2h* | -1792.8977101 | -1793.0029600 | -1793.2073689 |
| Cu(H2O)2 *Cs* | -1792.8991623 | -1793.0037125 | N/A |
| Cu(H2O)2 *C2* | **-1792.8992070** | **-1793.0035834** | N/A |
| Cu(H2O)3 *D3h* *#1* | -1869.3384402 | -1869.4466918 | -1869.6752768 |
| Cu(H2O)3 *D3h* *#2* | -1869.3441930 | -1869.4488446 | -1869.6777787 |
| Cu(H2O)3 *D3* | -1869.3444412 | -1869.4496906 | -1869.6786167 |
| Cu(H2O)3 *C2v* *#1* | -1869.3422760 | -1869.4501076 | -1869.6777314 |
| Cu(H2O)3 *C2v* *#2* | -1869.3453255 | -1869.4513135 | **-1869.6794642** |
| Cu(H2O)3 *C2* | -1869.3453343 | -1869.4514670 | N/A |
| Cu(H2O)3 *Cs* *#1* | -1869.3453124 | -1869.4513008 | N/A |
| Cu(H2O)3 *Cs* *#2* | -1869.3455338 | -1869.4514154 | N/A |
| Cu(H2O)3 *C1* | **-1869.3454180** | **-1869.4515991** | N/A |
| Cu(H2O)3+ *Cs* [2+1] | -1869.3444406 | -1869.4569468 | **-1869.6849801** |
| Cu(H2O)3+ *C1* [2+1] | **-1869.3445304** | **-1869.4569754** | N/A |

**Table S2** (continued)

|  | HF/6-31G* | HF/6-31+G* | HF/6-311+G* |
| --- | --- | --- | --- |
| Cu(H2O)4+ *D4h* *#1* | -1942.5792468 | -1942.6678280 | -1942.9039011 |
| Cu(H2O)4+ *D4h* *#2* | -1942.5818899 | -1942.6698173 | -1942.9059355 |
| Cu(H2O)4+ *D2h* *#1* | -1942.5881286 | **-1942.6755826** | **-1942.9122776** |
| Cu(H2O)4+ *D4* | -1942.5874357 | -1942.6748497 | -1942.9115580 |
| Cu(H2O)4+ *D2d* *#1* | -1942.5980756 | -1942.6782045 | -1942.9148709 |
| Cu(H2O)4+ *D2d* *#2* | -1942.5819090 | N/A | -1942.9059355 |
| Cu(H2O)4+ *D2d* *#3* | -1942.5977246 | -1942.6777707 | -1942.9144397 |
| Cu(H2O)4+ *C4v* *#1* | -1942.5819896 | N/A | N/A |
| Cu(H2O)4+ *C4h* *#1* | -1942.5794773 | -1942.6681329 | N/A |
| Cu(H2O)4+ *C2v* *#2* | -1942.5964694 | -1942.6765992 |  |
| Cu(H2O)4+ *C2v* *#3* | *C2v* *#14* | *D2h* *#1* |  |
| Cu(H2O)4+ *C2v* *#4* | N/A | N/A |  |
| Cu(H2O)4+ *C2v* *#5* | -1942.5819903 | N/A |  |
| Cu(H2O)4+ *C2v* *#6* | N/A | N/A |  |
| Cu(H2O)4+ *C2v* *#11* | *D2d* *#1* | N/A | N/A |
| Cu(H2O)4+ *C2v* *#14* [3+1] | -1942.5969389 | -1942.6810135 | -1942.9182726 |
| Cu(H2O)4+ *C2v* *#16* [3+1] | **-1942.5976115** | **-1942.6811552** | **-1942.9184067** |
| Cu(H2O)4+ *C2v* *#17* | -1942.5863813 | -1942.6740161 | -1942.9106277 |
| Cu(H2O)4+ *C4* *#1* | **-1942.5892014** | N/A | N/A |
| Cu(H2O)4+ *C4 #2* | *C4* *#1* | *D4* | N/A |
| Cu(H2O)4+ *C4 #4* | *C4* *#1* | N/A | N/A |
| Cu(H2O)4+ *S4* *#1* | -1942.5989671 | -1942.6788936 | **-1942.9156833** |
| Cu(H2O)4+ *S4* *#2* | N/A | *S4* *#1* | N/A |
| Cu(H2O)4+ *S4* *#3* | *S4* *#1* | N/A | *S4* *#1* |
| Cu(H2O)4+ *S4* *#4* | *S4* *#1* | *S4* *#1* | *S4* *#1* |
| Cu(H2O)4+ *S4* *#5* | *S4* *#1* | *S4* *#1* | *S4* *#1* |
| Cu(H2O)4+ *D2* *#1* | -1942.5984351 | -1942.6782127 | *D2d* *#1* |
| Cu(H2O)4+ *D2* *#2* | *D2h* *#1* | N/A | *D2h* *#1* |
| Cu(H2O)4+ *D2* *#3* | *D2* *#1* | *D2* *#1* | *D2d* *#1* |
| Cu(H2O)4+ *D2* *#8* | *D2* *#1* | *D2* *#1* | *D2d* *#1* |
| Cu(H2O)4+ *C2* *#1* | **-1942.5992334** | *S4* *#1* |  |
| Cu(H2O)4+ *C2* *#3* | *C2v* *#16* | N/A | N/A |
| Cu(H2O)4+ *C2* *#4* | *C2*#1 | *S4* *#1* | N/A |
| Cu(H2O)4+ *C2* *#5* | *C2v* *#16* | *C2v* *#16* | *C2v* *#16* |
| Cu(H2O)4+ *Cs* *#1* | -1942.5866291 | **-1942.6789056** |  |
| Cu(H2O)4+ *Cs* *#6* | *D2d* *#1* | N/A |  |
| Cu(H2O)4+ *Cs* *#9* | *D2d* *#3* | *D2d* *#3* |  |
| Cu(H2O)4+ *Cs* *#10* | *D2d* *#1* | *D2d* *#1* |  |
| Cu(H2O)4+ *Ci* *#1* | *D2h* *#1* | *D2h* *#1* |  |
| Cu(H2O)4+ *C1* *#2* | *C2* *#1* | *Cs* *#1* |  |
| Cu(H2O)4+ *C2v* [2+2] | **-1942.5855844** | **-1942.6740251** | **-1942.9110610** |
| Cu(H2O)4+ *C2* [2+2] | **-1942.5888599** | **-1942.6767673** | **-1942.9141166** |

**Table S2** (continued)

|  | MP2/6-31G* | MP2/6-31+G* | MP2/6-311+G* |
| --- | --- | --- | --- |
| Cu(H2O)4+ *D4h* *#1* | -1943.6198268 | -1943.7637739 | -1944.1415353 |
| Cu(H2O)4+ *D4h* *#2* | -1943.6234706 | -1943.7644155 | -1944.1417151 |
| Cu(H2O)4+ *D2h* *#1* | -1943.6365616 | -1943.7759879 | -1944.1542975 |
| Cu(H2O)4+ *D2h* *#2* | -1943.6213525 | -1943.7640884 | -1944.1416316 |
| Cu(H2O)4+ *D2h* *#3* | -1943.6246067 | -1943.7648049 | -1944.1419162 |
| Cu(H2O)4+ *D4* | -1943.6308908 | -1943.7726593 | -1944.1516962 |
| Cu(H2O)4+ *D2d* *#1* | -1943.6418381 | -1943.7771432 | -1944.1549841 |
| Cu(H2O)4+ *D2d* *#2* | -1943.6236399 | -1943.7649735 | -1944.1432768 |
| Cu(H2O)4+ *D2d* *#3* | -1943.6410956 | -1943.7755182 | -1944.1545072 |
| Cu(H2O)4+ *C4v* *#1* | -1943.6241071 | N/A | N/A |
| Cu(H2O)4+ *C4v* *#2* | -1943.6198276 | N/A | N/A |
| Cu(H2O)4+ *C4h* *#1* | -1943.6218437 | -1943.7672050 | -1944.1433498 |
| Cu(H2O)4+ *C2v* *#1* | -1943.6243648 [3+1] | -1943.7666616 [3+1] | -1944.1424480 [3+1] |
| Cu(H2O)4+ *C2v* *#2* | -1943.6401188 | -1943.7763051 | -1944.1543491 |
| Cu(H2O)4+ *C2v* *#3* | *C2v* *#14* | *D2h* *#1* | -1944.1647947 |
| Cu(H2O)4+ *C2v* *#4* | -1943.6375141 | -1943.7760049 | N/A |
| Cu(H2O)4+ *C2v* *#5* | -1943.6241068 | N/A | N/A |
| Cu(H2O)4+ *C2v* *#6* | N/A | -1943.7755322 | *D2d* *#3* |
| Cu(H2O)4+ *C2v* *#7* | *C2v* *#1* | *C2v* *#1* | *C2v* *#1* |
| Cu(H2O)4+ *C2v* *#8* | *D2d* *#3* | *C2v* *#6* | *D2d* *#3* |
| Cu(H2O)4+ *C2v #9* | *C4v* *#1* | N/A | N/A |
| Cu(H2O)4+ *C2v #10* | *D2d* *#3* | N/A | N/A |
| Cu(H2O)4+ *C2v #11* | *D2d* *#1* | N/A | N/A |
| Cu(H2O)4+ *C2v #12* | *C4v* *#1* nearly | N/A | N/A |
| Cu(H2O)4+ *C2v #14* [3+1] | -1943.6487252 | -1943.7854294 | -1944.1647947 |
| Cu(H2O)4+ *C2v #16* [3+1] | -1943.6506427 | -1943.7861365 | -1944.1652182 |
| Cu(H2O)4+ *C2v #17* | -1943.6474137 [2+2] | -1943.7723059 | -1944.1507143 |
| Cu(H2O)4+ *C2h* *#1* | -1943.6366541 | -1943.7766158 | -1944.1544223 |
| Cu(H2O)4+ *C2h* *#2* | -1943.6475939 [2+2] | -1943.7906335 [2+2] | -1944.1699027 [2+2] |
| Cu(H2O)4+ *C2h* *#3* | -1943.6245606 | -1943.7678661 | -1944.1435562 |
| Cu(H2O)4+ *C2h* *#4* | *C2h* *#3* | *C2h* *#3* | *C2h* *#3* |
| Cu(H2O)4+ *C2h* *#5* | *D2h* *#1* | *D2h* *#1* | *D2h* *#1* |
| Cu(H2O)4+ *C2h* *#6* | *D2h* *#1* | *D2h* *#1* | *D2h* *#1* |
| Cu(H2O)4+ *C2h* *#7* | *C2h* *#1* | *C2h* *#1* | *C2h* *#1* |
| Cu(H2O)4+ *C2h* *#8* | *C2h* *#1* | *C2h* *#1* | *C2h* *#1* |
| Cu(H2O)4+ *C4* *#1* | -1943.6346064 | -1943.7727688 | N/A |
| Cu(H2O)4+ *C4* *#2* | *C4* *#1* | -1943.7726601 (i A) | *D4* |
| Cu(H2O)4+ *C4* *#3* | *C4* *#1* | N/A | N/A |
| Cu(H2O)4+ *C4* *#4* | *C4* *#1* | N/A | N/A |
| Cu(H2O)4+ *S4* *#1* | -1943.6454207 | -1943.7779412 | -1944.1566119 |
| Cu(H2O)4+ *S4* *#2* | -1943.6436895 | -1943.7780450 | *S4* *#1* |
| Cu(H2O)4+ *S4* *#3* | *S4* *#2* | *S4* *#2* | *S4* *#1* |

**Table S2** (continued)

| Cu(H2O)4+ *S4* *#4* | *S4* *#2* | *S4* *#2* | *S4* *#1* |
| --- | --- | --- | --- |
| Cu(H2O)4+ *S4* *#5* | *S4* *#2* | *S4* *#2* | -1944.1563708 |
| Cu(H2O)4+ *D2* *#1* | -1943.6450357 | -1943.7778445 | -1944.1557085 |
| Cu(H2O)4+ *D2* *#2* | *D2h* *#1* | *D2h* *#1* | *D2h* *#1* |
| Cu(H2O)4+ *D2* *#3* | *D2* *#1* | *D2* *#1* | *D2* *#1* |
| Cu(H2O)4+ *D2* *#4* | *D2h* *#1* | *D2h* *#1* | *D2h* *#1* |
| Cu(H2O)4+ *D2* *#6* | *D2h* *#1* | *D2h* *#1* | *D2h* *#1* |
| Cu(H2O)4+ *D2* *#8* | *D2* *#1* | *D2* *#1* | *D2* *#1* |
| Cu(H2O)4+ *C2* *#1* | **-1943.6466160** | *C2* *#4* |  |
| Cu(H2O)4+ *C2* *#2* | *C2v* *#4* | N/A |  |
| Cu(H2O)4+ *C2* *#3* | *C2v* *#16* | -1943.7861483 [3+1] | -1944.1652194 [3+1] |
| Cu(H2O)4+ *C2* *#4* | *C2* *#1* | **-1943.7914365** [2+2] | **-1944.1706864** [2+2] |
| Cu(H2O)4+ *C2* *#5* | *C2v* *#16* | *C2* *#3* | *C2* *#3* |
| Cu(H2O)4+ *C2* *#6* | *C2v* *#16* | *C2* *#3* | *C2* *#3* |
| Cu(H2O)4+ *C2* *#7* | **-1943.6490472** [2+2] | *C2* *#4* | *C2* *#4* |
| Cu(H2O)4+ *C2* *#8* | *C2* *#1* | *C2* *#4* | N/A |
| Cu(H2O)4+ *C2* *#9* | *C2* *#1* | *C2* *#4* | N/A |
| Cu(H2O)4+ *C2* *#12* | N/A | -1943.7784233 |  |
| Cu(H2O)4+ *C2* *#14* | *C2* *#1* | *C2* *#12* | **-1944.1574372** |
| Cu(H2O)4+ *Cs* *#1* | -1943.6477237 [2+2] | -1943.7906052 [2+2] | -1944.1507142 |
| Cu(H2O)4+ *Cs* *#2* | -1943.6413091 | -1943.7765132 | -1944.1549520 |
| Cu(H2O)4+ *Cs* *#3* | *Cs* *#2* | N/A | N/A |
| Cu(H2O)4+ *Cs* *#4* | *Cs* *#1* | N/A | N/A |
| Cu(H2O)4+ *Cs* *#5* | -1943.6434422 | -1943.7774535 | -1944.1553705 |
| Cu(H2O)4+ *Cs* *#6* | *C2v* *#2* | N/A | N/A |
| Cu(H2O)4+ *Cs* *#7* | *C2v* *#14* | *C2v* *#14* | *C2v* *#14* |
| Cu(H2O)4+ *Cs* *#8* | -1943.6315616 [3+1] | -1943.7702908 [3+1] | N/A |
| Cu(H2O)4+ *Cs* *#9* | -1943.6401781 | *Cs #7* | *C2v* *#14* |
| Cu(H2O)4+ *Cs* *#10* | N/A | -1943.7876553 [2+2] | N/A |
| Cu(H2O)4+ *Cs* *#11* | -1943.6509525 [3+1] | -1943.7867466 [3+1] | -1944.1650462 [3+1] |
| Cu(H2O)4+ *Cs* *#12* | -1943.6402154 | *Cs* *#10* |  |
| Cu(H2O)4+ *Cs* *#13* | *Cs* *#11* | *C2h* *#2* |  |
| Cu(H2O)4+ *Cs* *#14* | *Cs* *#5* | *Cs* *#10* |  |
| Cu(H2O)4+ *Cs* *#15* | -1943.6308015 [3+1] | *N/A* |  |
| Cu(H2O)4+ *Ci* *#1* | -1943.6477620 [2+2] | -1943.7909691 [2+2] | -1944.1699027 [2+2] |
| Cu(H2O)4+ *Ci* *#2* | *Ci* *#1* | *Ci* *#1* | *Ci* *#1* |
| Cu(H2O)4+ *Ci* *#3* | *Ci* *#1* | *Ci* *#1* | N/A |

**Table S2** (continued)

| Cu(H2O)4+ *C1* *#2* | *C2* *#1* | *C2* *#4* | **-1944.1592944** |
| --- | --- | --- | --- |
| Cu(H2O)4+ *C1* *#3* | *C2* *#7* | **-1943.7913445** [2+2] |  |
| Cu(H2O)4+ *C1* *#4* | *C2* *#7* | **-1943.7812297** |  |
| Cu(H2O)4+ *C1* *#7* | **-1943.6460610** | *C1* *#4* |  |
| Cu(H2O)4+ *C1* *#8* | **-1943.6512632** [3+1] | **-1943.7869806** [3+1] |  |
| Cu(H2O)4+ *C1* *#9* | **-1943.6482458** [3+1] | *C1* *#3* |  |
| Cu(H2O)4+ *C1* *#10* | N/A | **-1943.7881574** [2+2] |  |
| Cu(H2O)4+ *C1* *#13* | **-1943.6483154** [3+1] | N/A |  |
| Cu(H2O)4+ *C2v* [2+2] | -1943.6447565 | -1943.7879784 | **-1944.1669969** |
| Cu(H2O)4+ *Cs #1*[2+2] | -1943.6447761 | -1943.7879784 | N/A |
| Cu(H2O)4+ *Cs #2*[2+2] | -1943.6448329 | **-1943.7881574** | N/A |
| Cu(H2O)4+ *C2* [2+2] | **-1943.6490472** | **-1943.7914365** | **-1944.1706864** |

|  | B3LYP/6-31G* | B3LYP/6-31+G* | B3LYP/6-311+G* |
| --- | --- | --- | --- |
| Cu(H2O)4+ *D4h* *#1* | -1945.7592101 | -1945.8809898 | -1946.1312305 |
| Cu(H2O)4+ *D4h* *#2* | -1945.7608912 | -1945.8811790 | -1946.1313873 |
| Cu(H2O)4+ *D2h* *#1* | -1945.7743730 | -1945.8920225 | -1946.1425887 |
| Cu(H2O)4+ *D2h* *#2* | -1945.7601626 | -1945.8810919 | *D4h* *#1* |
| Cu(H2O)4+ *D2h* *#3* | -1945.7621541 | -1945.8815049 | -1946.1314249 |
| Cu(H2O)4+ *D4* | -1945.7691422 | -1945.8887019 | -1946.1397223 |
| Cu(H2O)4+ *D2d* *#1* | -1945.7785957 | -1945.8927696 | -1946.1435303 |
| Cu(H2O)4+ *D2d* *#2* | -1945.7615539 | -1945.8810820 | -1946.1318199 |
| Cu(H2O)4+ *D2d* *#3* | -1945.7788028 | -1945.8916110 | -1946.1429256 |
| Cu(H2O)4+ *C4v* *#1* | -1945.7613846 | N/A | N/A |
| Cu(H2O)4+ *C4h* *#1* | -1945.7616947 | -1945.8843163 | -1946.1328045 |
| Cu(H2O)4+ *C2v* *#1* | -1945.7635482 [3+1] | -1945.8831791 | N/A |
| Cu(H2O)4+ *C2v* *#2* | -1945.7797133 | -1945.8923034 |  |
| Cu(H2O)4+ *C2v* *#3* | N/A | *C2v #14* | *C2v #14* |
| Cu(H2O)4+ *C2v* *#4* | -1945.7750006 | -1945.8920921 | -1946.1425887 |
| Cu(H2O)4+ *C2v* *#6* | -1945.7788918 | N/A | N/A |
| Cu(H2O)4+ *C2v* *#7* | *C2v* *#1* | *C2v* *#1* | N/A |
| Cu(H2O)4+ *C2v* *#8* | *C2v* *#6* | *D2d* *#3* | *D2d* *#3* |
| Cu(H2O)4+ *C2v* *#11* | *C2v #15* | N/A | N/A |
| Cu(H2O)4+ *C2v* *#12* | -1945.7617134 | N/A | N/A |
| Cu(H2O)4+ *C2v* *#13* | *C2v #15* | *D2d* *#1* | *D2d* *#1* |
| Cu(H2O)4+ *C2v #14* [3+1] | -1945.7879676 | -1945.9018743 | -1946.1540298 |
| Cu(H2O)4+ *C2v #15* | -1945.7787332 | N/A | N/A |
| Cu(H2O)4+ *C2v #16* [3+1] | -1945.7895962 | -1945.9024446 | **-1946.1546757** |
| Cu(H2O)4+ *C2v #17* | -1945.7704052 | -1945.888526 | -1946.1396328 |

**Table S2** (continued)

| Cu(H2O)4+ *C2h #1* | -1945.7747049 | -1945.8924946 | -1946.1425887 |
| --- | --- | --- | --- |
| Cu(H2O)4+ *C2h #2* | -1945.7857337 [2+2] | -1945.9078276 [2+2] | N/A |
| Cu(H2O)4+ *C2h #3* | -1945.7641609 | -1945.8847153 | -1946.1328102 |
| Cu(H2O)4+ *C2h #4* | *C2h#3* | *C2h#3* | *C2h#3* |
| Cu(H2O)4+ *C2h #5* | *D2h* *#1* | *D2h* *#1* | *D2h* *#1* |
| Cu(H2O)4+ *C2h #6* | *D2h* *#1* | *D2h* *#1* | *D2h* *#1* |
| Cu(H2O)4+ *C2h #7* | *C2h* *#1* | *C2h* *#1* | *C2h* *#1* |
| Cu(H2O)4+ *C2h #8* | *C2h #1* | *C2h* *#1* | *D2h #1* |
| Cu(H2O)4+ *C4* *#1* | -1945.7727384 | -1945.8888240 | N/A |
| Cu(H2O)4+ *C4* *#2* | *C4* *#1* | *C4* *#1* | *D4* |
| Cu(H2O)4+ *C4* *#4* | *C4* *#1* | N/A | N/A |
| Cu(H2O)4+ *S4* *#1* | -1945.7813923 | -1945.8930439 | -1946.1444451 |
| Cu(H2O)4+ *S4* *#2* | *S4* *#1* | -1945.8935888 | *S4* *#1* |
| Cu(H2O)4+ *S4* *#3* | *S4* *#1* | *S4* *#2* | *S4* *#1* |
| Cu(H2O)4+ *S4* *#4* | *S4* *#1* | *S4* *#2* | *S4* *#1* |
| Cu(H2O)4+ *S4* *#5* | *S4* *#1* | *S4* *#2* | *S4* *#1* |
| Cu(H2O)4+ *D2* *#1* | -1945.7823218 | -1945.8931847 | -1946.1438260 |
| Cu(H2O)4+ *D2* *#2* | *D2h* *#1* | *D2h* *#1* | *D2h* *#1* |
| Cu(H2O)4+ *D2* *#3* | *D2* *#1* | *D2* *#1* | *D2* *#1* |
| Cu(H2O)4+ *D2* *#4* | *D2h* *#1* | *D2h* *#1* | *D2h* *#1* |
| Cu(H2O)4+ *D2* *#6* |  | *D2h* *#1* |  |
| Cu(H2O)4+ *D2* *#8* | *D2* *#1* | *D2* *#1* | *D2* *#1* |
| Cu(H2O)4+ *C2* *#1* | -1945.784843 | *C2* *#4* |  |
| Cu(H2O)4+ *C2* *#2* |  | *D2h* *#1* |  |
| Cu(H2O)4+ *C2* *#3* | *C2v #16* | -1945.9025095 [3+1] | *C2v #16* |
| Cu(H2O)4+ *C2* *#4* | *C2* *#1* | **-1945.9086611** [2+2] |  |
| Cu(H2O)4+ *C2* *#5* | *C2* *#3* | *C2* *#3* |  |
| Cu(H2O)4+ *C2* *#6* | *C2v #16* | *C2* *#3* | *C2v #16* |
| Cu(H2O)4+ *C2* *#7* | **-1945.7875205** [2+2] | **-1945.9085038** [2+2] | N/A |
| Cu(H2O)4+ *C2* *#8* | *C2* *#1* | *C2* *#7* | N/A |
| Cu(H2O)4+ *C2* *#9* | **-1945.7848301** | *C2* *#4* | **-1946.1600943** [2+2] |
| Cu(H2O)4+ *C2* *#14* | *C2 #9* | *C2* *#4* | *C2 #9* |
| Cu(H2O)4+ *Cs* *#1* | -1945.7862774 [2+2] | -1945.9077535 [2+2] | -1946.1396764 |
| Cu(H2O)4+ *Cs* *#2* | -1945.7798813 | -1945.8917063 | N/A |
| Cu(H2O)4+ *Cs* *#5* | -1945.7805016 | -1945.8917063 | -1946.1435616 |
| Cu(H2O)4+ *Cs* *#6* | *Cs* *#5* | N/A | N/A |
| Cu(H2O)4+ *Cs* *#7* | *C2v #14* | *C2v #14* | N/A |
| Cu(H2O)4+ *Cs* *#8* | -1945.7691079 [3+1] | -1945.8832207 [3+1] | N/A |
| Cu(H2O)4+ *Cs* *#9* | *Cs* *#2* | *Cs#7* | N/A |
| Cu(H2O)4+ *Cs* *#10* | N/A | -1945.9041675 [2+2] | N/A |
| Cu(H2O)4+ *Cs* *#11* | -1945.7887506 [3+1] | -1945.9026850 [3+1] | -1946.1540996 [3+1] |
| Cu(H2O)4+ *Cs* *#12* |  | -1945.9043770 [2+2] |  |
| Cu(H2O)4+ *Cs* *#13* |  | *C2h #2* |  |

**Table S2** (continued)

| Cu(H2O)4+ *Cs* *#14* |  | *Cs* *#12* |  |
| --- | --- | --- | --- |
| Cu(H2O)4+ *Ci* *#1* | -1945.7862090 [2+2] | -1945.9082071 [2+2] | -1946.1595667 [2+2] |
| Cu(H2O)4+ *Ci* *#2* | -1945.7862782 [2+2] | *Ci* *#1* | -1946.1596848 [2+2] |
| Cu(H2O)4+ *Ci* *#3* | *Ci* *#2* | *Ci* *#1* | N/A |
| Cu(H2O)4+ *C1* *#1* |  | **-1945.9085598** [2+2] |  |
| Cu(H2O)4+ *C1* *#2* | *C2* *#1* | *C2* *#4* | **-1946.1458124** |
| Cu(H2O)4+ *C1* *#4* |  | **-1945.8952382** |  |
| Cu(H2O)4+ *C1* *#5* |  | **-1945.9085185** [2+2] |  |
| Cu(H2O)4+ *C1* *#8* |  | **-1945.9029827** [3+1] |  |
| Cu(H2O)4+ *C1* *#9* |  | **-1945.9087125** [2+2] |  |
| Cu(H2O)4+ *C1* *#10* |  | **-1945.9046881** [2+2] |  |
| Cu(H2O)4+ *C2v* [2+2] | -1945.7823680 | -1945.9044673 | **-1946.1558621** |
| Cu(H2O)4+ *Cs #1*[2+2] | -1945.7825794 | -1945.904622 | N/A |
| Cu(H2O)4+ *Cs #2*[2+2] | -1945.7825900 | -1945.904598 | N/A |
| Cu(H2O)4+ *C2* [2+2] | **-1945.7875205** | **-1945.9085039** | **-1946.1600943** |

**Table S2** (continued)

|  | HF/6-31G* | HF/6-31+G* | HF/6-311+G* |
| --- | --- | --- | --- |
| Cu(H2O)5+ *C2v #1* [5+0] | -2018.6214662 | -2018.7087888 | -2018.9664789 |
| Cu(H2O)5+ *C2v #2* [5+0] | -2018.6245880 | -2018.7094253 | -2018.9670684 |
| Cu(H2O)5+ *C2v #3* [5+0] | -2018.6256997 | -2018.7115457 | -2018.9694302 |
| Cu(H2O)5+ *C2v #4* [5+0] | *C2v #1* [4+1] | *C2v #1* [4+1] | *C2v #1* [4+1] |
| Cu(H2O)5+ *C2 #1* [5+0] | -2018.6250324 | *C2 #3* [5+0] | *C2 #3* [5+0] |
| Cu(H2O)5+ *C2 #2* [5+0] | *C2 #3* [5+0] | *C2 #3* [5+0] | *C2 #3* [5+0] |
| Cu(H2O)5+ *C2 #3* [5+0] | **-2018.6295060** | -2018.7117663 | **-2018.9697448** |
| Cu(H2O)5+ *Cs #1* [5+0] | *C2v #2* [5+0] | *C2v #2* [5+0] | *C2v #2* [5+0] |
| Cu(H2O)5+ *Cs #2* [5+0] | -2018.6237967 | -2018.7115537 | -2018.9694288 |
| Cu(H2O)5+ *Cs #5* [5+0] | N/A | *Cs #2* [5+0] | N/A |
| Cu(H2O)5+ *C2v #1* [4+1] | -2018.6338101 | -2018.7182514 | -2018.9767820 |
| Cu(H2O)5+ *C2v #2* [4+1] | -2018.6328524 | -2018.7174248 | -2018.9758465 |
| Cu(H2O)5+ *C2 #1* [4+1] | -2018.6345940 | -2018.7189468 | **-2018.9774176** |
| Cu(H2O)5+ *C2 #2* [4+1] | *C2 #1* [4+1] | *C2 #1* [4+1] | *C2 #1* [4+1] |
| Cu(H2O)5+ *Cs #4* [4+1] | *C2v #1* [4+1] | *C2v #1* [4+1] | *C2v #1* [4+1] |
| Cu(H2O)5+ *C2v #1* [3+2] | -2018.6207510 | -2018.7118052 | -2018.9705138 |
| Cu(H2O)5+ *C2v #2* [3+2] | -2018.6239096 | -2018.7135357 | -2018.9725275 |
| Cu(H2O)5+ *C2v #3* [3+2] | -2018.6226179 | -2018.7126633 | -2018.9715387 |
| Cu(H2O)5+ *C2v #4* [3+2] | -2018.6251569 | -2018.7142029 | -2018.9731897 |
| Cu(H2O)5+ *C2v #5* [3+2] | -2018.6263911 | -2018.7155726 | -2018.9748001 |
| Cu(H2O)5+ *C2v #6* [3+2] | -2018.6264118 | **-2018.7160496** | **-2018.9752409** |
| Cu(H2O)5+ *C2v #7* [3+2] | **-2018.6292856** | **-2018.7192994** | **-2018.9780519** |
| Cu(H2O)5+ *C2v #8* [3+2] | -2018.6261449 | -2018.7151925 | -2018.9744358 |
| Cu(H2O)5+ *C2 #1* [3+2] | *C2v #4* [3+2] | -2018.7143972 | **-2018.9732795** |
| Cu(H2O)5+ *Cs #1* [3+2] | *C2v #2* [3+2] | *C2v #2* [3+2] | *C2v #2* [3+2] |
| Cu(H2O)5+ *C2 #2* [3+2] | *C2v #4* [3+2] | *C2 #1* [3+2] | *C2 #1* [3+2] |
| Cu(H2O)5+ *C2 #3* [3+2] | *C2v #4* [3+2] | *C2 #1* [3+2] | *C2 #1* [3+2] |
| Cu(H2O)5+ *Cs #4* [3+2] | *C2v #4* [3+2] | *C2v #4* [3+2] | *C2v #4* [3+2] |
| Cu(H2O)5+ *Cs #6* [3+2] | **-2018.6287186** | **-2018.7178326** | **-2018.9769375** |
| Cu(H2O)5+ *C2 #5* [3+2] | *C2v #7* [3+2] | *C2v #7* [3+2] | *C2v #7* [3+2] |
| Cu(H2O)5+ *C2 #6* [3+2] | **-2018.6265306** | N/A | N/A |
| Cu(H2O)5+ *C2 #8* [3+2] | *C2 #6* [3+2] | *C2v #6* [3+2] | *C2v #6* [3+2] |
| Cu(H2O)5+ *Cs #13* [3+2] | N/A | -2018.7155425 | *C2v #7* [3+2] |
| Cu(H2O)5+ *Cs* #1 [2+3] | **-2018.6217766** | **-2018.7146560** | **-2018.9736155** |
| Cu(H2O)5+ *Cs* #2 [2+3] | -2018.6212446 | -2018.7145057 | -2018.9734344 |

**Table S2** (continued)

|  | MP2/6-31G* | MP2/6-31+G* | MP2/6-311+G* |
| --- | --- | --- | --- |
| Cu(H2O)5+ *C2v #1* [5+0] | -2019.8528274 | -2020.0018355 | -2020.4164238 |
| Cu(H2O)5+ *C2v #2* [5+0] | -2019.8587524 | -2020.0035129 | -2020.4171013 |
| Cu(H2O)5+ *C2v #3* [5+0] | -2019.8599942 | -2020.0070288 | -2020.4207252 |
| Cu(H2O)5+ *C2v #4* [5+0] | *C2v #1* [4+1] | *C2v #1* [4+1] | *C2v #1* [4+1] |
| Cu(H2O)5+ *C2 #1* [5+0] | -2019.8607812 | *C2 #5* [3+2] | -2020.4187911 |
| Cu(H2O)5+ *C2 #2* [5+0] | *C2 #3* [5+0] | *C2 #6* [3+2] | *C2 #6* [3+2] |
| Cu(H2O)5+ *C2 #3* [5+0] | **-2019.8668800** | *C2 #5* [3+2] | *C2 #5* [3+2] |
| Cu(H2O)5+ *Cs #1* [5+0] | *C2v #2* [5+0] | -2020.0040334 | -2020.4174225 |
| Cu(H2O)5+ *Cs #2* [5+0] | -2019.8570791 | *Cs #5* [4+1] | *Cs #5* [4+1] |
| Cu(H2O)5+ *Cs #3* [5+0] | N/A | *Cs #1* [5+0] | *Cs #1* [5+0] |
| Cu(H2O)5+ *Cs #4* [5+0] | N/A | *Cs #2* [4+1] | *Cs #2* [4+1] |
| Cu(H2O)5+ *Cs #5* [5+0] | N/A | -2020.0072057 | -2020.4213737 |
| Cu(H2O)5+ *Cs #6* [5+0] | N/A | *Cs #6* [4+1] | *Cs #6* [4+1] |
| Cu(H2O)5+ *C2v #1* [4+1] | -2019.8706940 | -2020.0144312 | -2020.4298880 |
| Cu(H2O)5+ *C2v #2* [4+1] | -2019.8696699 | -2020.0137006 | -2020.4289326 |
| Cu(H2O)5+ *C2 #1* [4+1] | -2019.8733045 | -2020.0170891 | -2020.4315439 |
| Cu(H2O)5+ *C2 #2* [4+1] | *C2 #1* [4+1] | *C2 #1* [4+1] | *C2 #1* [4+1] |
| Cu(H2O)5+ *Cs #1* [4+1] | N/A | -2020.0146271 | -2020.4299036 |
| Cu(H2O)5+ *Cs #2* [4+1] | N/A | -2020.0150998 | -2020.4300875 |
| Cu(H2O)5+ *Cs #3* [4+1] | N/A | -2020.0159750 | -2020.4322705 |
| Cu(H2O)5+ *Cs #4* [4+1] | *C2v #1* [4+1] | -2020.0145916 | *Cs #1* [4+1] |
| Cu(H2O)5+ *Cs #5* [4+1] |  | -2020.0118177 | -2020.4271442 |
| Cu(H2O)5+ *Cs #6* [4+1] |  | -2020.0178453 | -2020.4327087 |
| Cu(H2O)5+ *C2v #1* [3+2] | -2019.8587015 | -2020.0108682 | -2020.4266517 |
| Cu(H2O)5+ *C2v #2* [3+2] | -2019.8635226 | -2020.0123857 | -2020.4285407 |
| Cu(H2O)5+ *C2v #3* [3+2] | -2019.8630644 | -2020.0129218 | -2020.4287697 |
| Cu(H2O)5+ *C2v #4* [3+2] | -2019.8659240 | -2020.0137477 | -2020.4297949 |
| Cu(H2O)5+ *C2v #5* [3+2] | -2019.8720797 | -2020.0189333 | -2020.4346339 |
| Cu(H2O)5+ *C2v #6* [3+2] | -2019.8738383 | -2020.0209354 | -2020.4367404 |
| Cu(H2O)5+ *C2v #7* [3+2] | -2019.8800590 | -2020.0254449 | -2020.4401724 |
| Cu(H2O)5+ *C2v #8* [3+2] | -2019.8695781 | -2020.0165168 | -2020.4322453 |
| Cu(H2O)5+ *C2 #1* [3+2] | -2019.8678220 | -2020.0168901 | -2020.4322428 |
| Cu(H2O)5+ *Cs #1* [3+2] | *C2v #2* [3+2] | *C2v #2* [3+2] | *C2v #2* [3+2] |
| Cu(H2O)5+ *Cs #2* [3+2] | -2019.8634107 | -2020.0133996 | -2020.4274315 |
| Cu(H2O)5+ *C2 #2* [3+2] | *C2 #1* [3+2] | *C2 #1* [3+2] | *C2 #1* [3+2] |
| Cu(H2O)5+ *Cs #3* [3+2] | -2019.8696759 | -2020.0165468 | -2020.4313892 |
| Cu(H2O)5+ *C2 #3* [3+2] | *C2 #1* [3+2] | *C2 #1* [3+2] | *C2 #1* [3+2] |
| Cu(H2O)5+ *Cs #4* [3+2] | -2019.8659369 | -2020.0138301 | *C2v #4* [3+2] |
| Cu(H2O)5+ *Cs #5* [3+2] | -2019.8676290 | -2020.0157213 | -2020.4301185 |
| Cu(H2O)5+ *C2 #4* [3+2] | *C2 #1* [3+2] | *C2 #1* [3+2] | *C2 #1* [3+2] |
| Cu(H2O)5+ *Cs #6* [3+2] | -2019.8744422 | -2020.0209028 | -2020.4361376 |
| Cu(H2O)5+ *Cs #7* [3+2] | *Cs #4* [3+2] | *Cs #4* [3+2] | N/A |
| Cu(H2O)5+ *C2 #5* [3+2] | **-2019.8801815** | **-2020.0261011** | **-2020.4403038** |
| Cu(H2O)5+ *Cs #8* [3+2] | -2019.8727695 | -2020.0195144 | N/A |
| Cu(H2O)5+ *Cs #9* [3+2] | N/A | -2020.0189332 | N/A |
| Cu(H2O)5+ *C2 #6* [3+2] | **-2019.8742718** | -2020.0215729 | -2020.4367587 |
| Cu(H2O)5+ *Cs #10* [3+2] | **-2019.8741568** | -2020.0211966 | N/A |
| Cu(H2O)5+ *Cs #11* [3+2] | N/A | *Cs* #2 [2+3] | *Cs* #2 [2+3] |
| Cu(H2O)5+ *C2 #7* [3+2] | *C2 #5* [3+2] | *C2 #5* [3+2] | *C2 #5* [3+2] |
| Cu(H2O)5+ *Cs #12* [3+2] | **-2019.8803111** | **-2020.0258887** | **-2020.4402370** |
| Cu(H2O)5+ *C2 #8* [3+2] | *C2 #6* [3+2] | *C2 #6* [3+2] | *C2 #6* [3+2] |
| Cu(H2O)5+ *Cs #13* [3+2] | -2019.8715802 | -2020.0192835 | *Cs #12* [3+2] |
| Cu(H2O)5+ *C2 #9* [3+2] |  | -2020.0151598 | **-2020.4299584** |
| Cu(H2O)5+ *Cs* #1 [2+3] | -2019.8732486 | -2020.0271038 | **-2020.4431769** |
| Cu(H2O)5+ *C1* [2+3] | **-2019.8734468** | **-2020.0272470** | N/A |
| Cu(H2O)5+ *Cs* #2 [2+3] | -2019.8717710 | -2020.0263884 | -2020.4423098 |

**Table S2** (continued)

|  | B3LYP/6-31G* | B3LYP/6-31+G* | B3LYP/6-311+G* |
| --- | --- | --- | --- |
| Cu(H2O)5+ *C2v #1* [5+0] | -2022.2029604 | -2022.3267385 | *C2v #5* |
| Cu(H2O)5+ *C2v #2* [5+0] | -2022.2077724 | -2022.3283650 | -2022.600794 |
| Cu(H2O)5+ *C2v #3* [5+0] | -2022.2104692 | -2022.3316714 | -2022.6037445 |
| Cu(H2O)5+ *C2v #4* [5+0] | *C2v #1* [4+1] | *C2v #1* [4+1] | *C2v #1* [4+1] |
| Cu(H2O)5+ *C2 #1* [5+0] | *C2 #6* [3+2] | *C2 #6* [3+2] | N/A |
| Cu(H2O)5+ *C2 #2* [5+0] | -2022.2153883 | *C2 #5* [3+2] | *C2 #5* [3+2] |
| Cu(H2O)5+ *C2 #3* [5+0] | *C2 #5* [3+2] | *C2 #5* [3+2] | *C2v #6* [3+2] |
| Cu(H2O)5+ *Cs #1* [5+0] | -2022.2092328 | *Cs #14* [3+2] | N/A |
| Cu(H2O)5+ *Cs #2* [5+0] | *Cs #5* [4+1] | *Cs #5* [4+1] | N/A |
| Cu(H2O)5+ *Cs #3* [5+0] | N/A | *Cs #1* [3+2] | -2022.6007647 |
| Cu(H2O)5+ *Cs #4* [5+0] | *C2v #1* [5+0] | *Cs #2* [4+1] | *C2v #1* [5+0] |
| Cu(H2O)5+ *Cs #5* [5+0] | *Cs #15* [3+2] | *Cs #15* [3+2] | *Cs #1* [2+3] |
| Cu(H2O)5+ *Cs #6* [5+0] | *Cs #6* [4+1] | *Cs #6* [4+1] | *Cs #6* [4+1] |
| Cu(H2O)5+ *C2v #1* [4+1] | -2022.2209440 | -2022.3405284 | -2022.6153333 |
| Cu(H2O)5+ *C2v #2* [4+1] | -2022.2203291 | -2022.3401199 | -2022.6146170 |
| Cu(H2O)5+ *C2 #1* [4+1] | -2022.2235923 | -2022.3430741 | -2022.6169139 |
| Cu(H2O)5+ *C2 #2* [4+1] | *C2 #1* [4+1] | *C2 #1* [4+1] | *C2 #1* [4+1] |
| Cu(H2O)5+ *Cs #1* [4+1] | N/A | -2022.3405988 | N/A |
| Cu(H2O)5+ *Cs #2* [4+1] | N/A | -2022.3408409 | N/A |
| Cu(H2O)5+ *Cs #3* [4+1] | -2022.2208367 | -2022.3417255 | **-2022.6149447** |
| Cu(H2O)5+ *Cs #4* [4+1] | *C2v #1* [4+1] | *Cs #1* [4+1] | *C2v #1* [4+1] |
| Cu(H2O)5+ *Cs #5* [4+1] | -2022.2165543 | -2022.3382946 | N/A |
| Cu(H2O)5+ *Cs #6* [4+1] | -2022.2249107 | -2022.3435728 | -2022.6177731 |
| Cu(H2O)5+ *C2v #1* [3+2] | -2022.2117173 | -2022.3392639 | -2022.6139253 |
| Cu(H2O)5+ *C2v #2* [3+2] | -2022.2158440 | -2022.3408269 | -2022.6161584 |
| Cu(H2O)5+ *C2v #3* [3+2] | -2022.2160039 | -2022.3412797 | -2022.6160497 |
| Cu(H2O)5+ *C2v #4* [3+2] | -2022.2182594 | -2022.3421719 | -2022.6174575 |
| Cu(H2O)5+ *C2v #5* [3+2] | -2022.2223138 | -2022.3464072 | -2022.6212618 |
| Cu(H2O)5+ *C2v #6* [3+2] | -2022.2234829 | -2022.3485361 | -2022.6233378 |
| Cu(H2O)5+ *C2v #7* [3+2] | -2022.2293186 | -2022.3511746 | -2022.6259022 |
| Cu(H2O)5+ *C2v #8* [3+2] | -2022.2209125 | -2022.3449496 | -2022.6200863 |
| Cu(H2O)5+ *C2 #1* [3+2] | -2022.2194361 | -2022.3445749 | -2022.6191545 |
| Cu(H2O)5+ *Cs #1* [3+2] | *C2v #2* [3+2] | *C2v #2* [3+2] | *C2v #2* [3+2] |
| Cu(H2O)5+ *Cs #2* [3+2] | -2022.2147134 | -2022.3410059 | -2022.6149139 |
| Cu(H2O)5+ *C2 #2* [3+2] | *C2 #1* [3+2] | *C2 #1* [3+2] | *C2 #1* [3+2] |
| Cu(H2O)5+ *Cs #3* [3+2] | -2022.2191989 | -2022.3436135 | -2022.6177720 |
| Cu(H2O)5+ *C2 #3* [3+2] | *C2 #1* [3+2] | *C2 #1* [3+2] | *C2 #1* [3+2] |
| Cu(H2O)5+ *Cs #4* [3+2] | -2022.2183264 | -2022.3422277 | *C2v #4* [3+2] |
| Cu(H2O)5+ *Cs #5* [3+2] | -2022.2173366 | -2022.3424222 | -2022.6165856 |
| Cu(H2O)5+ *C2 #4* [3+2] | *C2 #1* [3+2] | *C2 #1* [3+2] | *C2 #1* [3+2] |
| Cu(H2O)5+ *Cs #6* [3+2] | -2022.2245952 | -2022.3478126 | **-2022.6230382** |
| Cu(H2O)5+ *Cs #7* [3+2] | *Cs #4* [3+2] | *Cs #4* [3+2] | N/A |
| Cu(H2O)5+ *C2 #5* [3+2] | **-2022.2297648** | -2022.3518178 | **-2022.6259068** |
| Cu(H2O)5+ *Cs #8* [3+2] | -2022.2228509 | -2022.3467205 | N/A |
| Cu(H2O)5+ *C2 #6* [3+2] | 2022.2240121 | -2022.3489903 | N/A |
| Cu(H2O)5+ *Cs #10* [3+2] | -2022.2240265 | -2022.3487170 | N/A |
| Cu(H2O)5+ *Cs #11* [3+2] | -2022.2235012 | *Cs #2* [2+3] | *Cs #2* [2+3] |
| Cu(H2O)5+ *C2 #7* [3+2] | *C2 #5* [3+2] | *C2 #5* [3+2] | *C2 #5* [3+2] |
| Cu(H2O)5+ *Cs #12* [3+2] | **-2022.2299880** | **-2022.3516829** | N/A |
| Cu(H2O)5+ *C2 #8* [3+2] | *C2 #6* [3+2] | *C2 #6* [3+2] | *C2v #6* [3+2] |
| Cu(H2O)5+ *Cs #13* [3+2] | -2022.2219622 | -2022.3470182 | -2022.6208418 |
| Cu(H2O)5+ *Cs #14* [3+2] |  | -2022.3422464 |  |
| Cu(H2O)5+ *Cs #15* [3+2] | -2022.2192390 | -2022.3437850 |  |
| Cu(H2O)5+ *Cs* #1 [2+3] | -2022.2238573 | -2022.3547489 | **-2022.6296289** |
| Cu(H2O)5+ *C1* [2+3] | **-2022.2240967** | **-2022.3548227** | N/A |
| Cu(H2O)5+ *Cs* #2 [2+3] | -2022.2221847 | -2022.3541524 | -2022.6291369 |

**Table S2** (continued)

|  | HF/6-31G* | HF/6-31+G* | HF/6-311+G* |
| --- | --- | --- | --- |
| Cu(H2O)6+ *Th* | -2094.6395626 | -2094.7417447 | -2095.0203996 |
| Cu(H2O)6+ *S6* | -2094.6503084 | **-2094.7449338** | **-2095.0239760** |
| Cu(H2O)6+ *C3 #1* | -2094.6527582 | N/A | N/A |
| Cu(H2O)6+ *C3h* | -2094.6527109 | -2094.7426398 | -2095.0214074 |
| Cu(H2O)6+ *C3 #2* | *C3h* | N/A | N/A |
| Cu(H2O)6+ *C3 #3* | N/A | *S6* | *S6* |
| Cu(H2O)6+ *D2d* [2+4] | **-2094.6537586** | **-2094.7516905** | **-2095.0322519** |

|  | MP2/6-31G* | MP2/6-31+G* | MP2/6-311+G* |
| --- | --- | --- | --- |
| Cu(H2O)6+ *Th* | -2096.0556818 | -2096.2307288 | -2096.6805584 |
| Cu(H2O)6+ *S6* | -2096.0756071 | **-2096.2385139** | **-2096.6875753** |
| Cu(H2O)6+ *C3 #1* | [3+3] | N/A | N/A |
| Cu(H2O)6+ *C3h* | -2096.0815521 | -2096.2364256 | -2096.6851475 |
| Cu(H2O)6+ *C3 #2* | *C3h* | N/A | N/A |
| Cu(H2O)6+ *C3 #3* | N/A | *S6* | *S6* |
| Cu(H2O)6+ *D2d* [2+4] | -2096.0959938 | -2096.2616871 | **-2096.7145110** |
| Cu(H2O)6+ *C2* [2+4] | **-2096.0965706** | **-2096.2618003** | N/A |

|  | B3LYP/6-31G* | B3LYP/6-31+G* | B3LYP/6-311+G* |
| --- | --- | --- | --- |
| Cu(H2O)6+ *Th* | -2098.6149401 | -2098.7633140 | -2099.0584589 |
| Cu(H2O)6+ *S6* | -2098.6339140 | -2098.7707286 | -2099.0664014 |
| Cu(H2O)6+ *C3 #1* | *C3h* | N/A | N/A |
| Cu(H2O)6+ *D2h #1* | -2098.6160838 | N/A | N/A |
| Cu(H2O)6+ *C3h* | -2098.6398305 | -2098.7687088 | -2099.0641592 |
| Cu(H2O)6+ *C3 #2* | *C3h* | N/A | N/A |
| Cu(H2O)6+ *C3 #3* | N/A | *S6* | *S6* |
| Cu(H2O)6+ *C2h #1* [4+2] | -2098.6369967 | N/A | N/A |
| Cu(H2O)6+ *C2h #2* | -2098.6226472 | N/A | N/A |
| Cu(H2O)6+ *C2h #3* [4+2] | -2098.6371395 | N/A | N/A |
| Cu(H2O)6+ *C2v #1* [3+3] | -2098.6579018 | N/A | N/A |
| Cu(H2O)6+ *C2v #2* [3+3] | -2098.6578769 | N/A | N/A |
| Cu(H2O)6+ *C2v #3* | *C2v #2* | N/A | N/A |
| Cu(H2O)6+ *D2d* [2+4] | -2098.6584535 | -2098.7995582 | **-2099.0979085** |
| Cu(H2O)6+ *C2* [2+4] | **-2098.6590013** | **-2098.7998157** | N/A |

**Figure S1**. Structures formed by desymmetrization of highest coordination structure.

Cu(H2O)1+ *C2v*

Cu(H2O)2+ *Cs*

Cu(H2O)2+ *C2*

Cu(H2O)3+ *D3h* #1

Cu(H2O)3+ *D3h* #2

Cu(H2O)3+ *D3*

Cu(H2O)3+ *C2v* #2

Cu(H2O)3+ *C2*

Cu(H2O)3+ *Cs* #1

Cu(H2O)3+ *Cs* #2


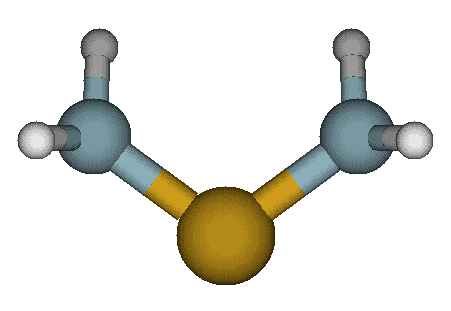


Cu(H2O)3+ *C2v* #1

Cu(H2O)2+ *D2d*

Cu(H2O)2+ *D2h*


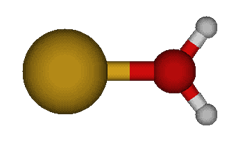

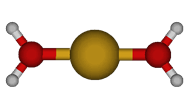

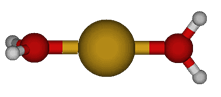

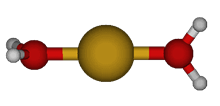

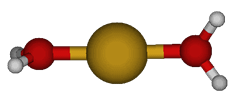

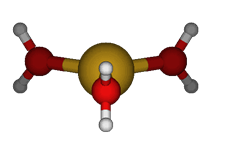

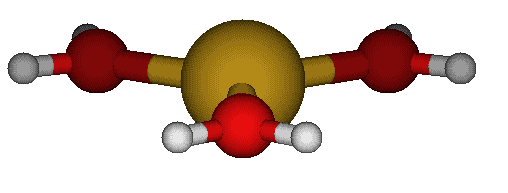

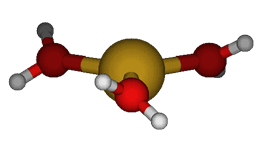

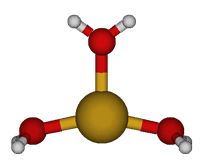

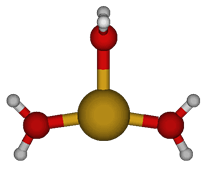

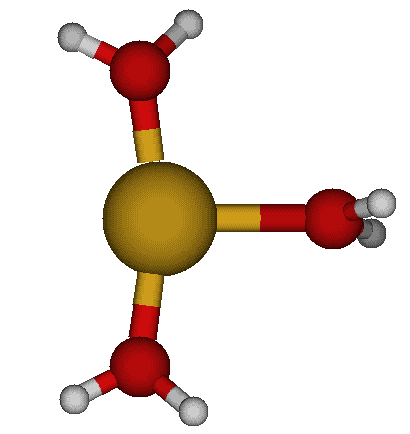


Cu(H2O)3+ *C1*


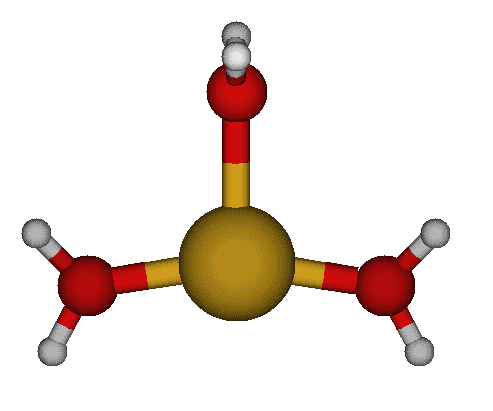

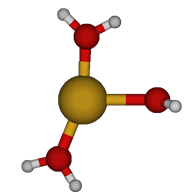

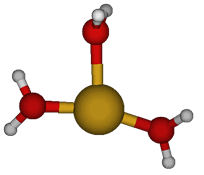


**Figure S1** (continued) **
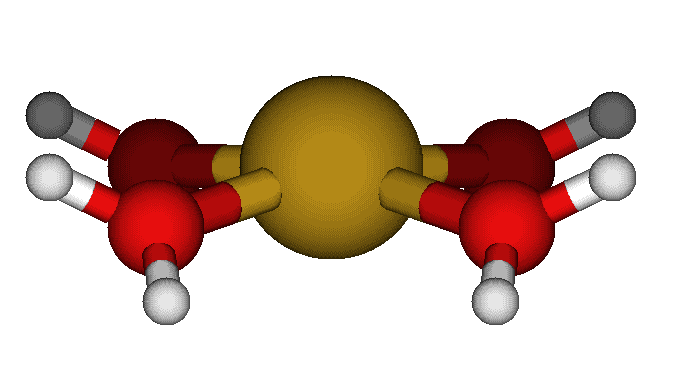
**

Cu(H2O)4+ *D4h* #1

Cu(H2O)4+ *D4*

Cu(H2O)4+ *D2d* #1

Cu(H2O)4+ *D2d*#2

Cu(H2O)4+ *C4v* #1

Cu(H2O)4+ *S4* #1

Cu(H2O)4+ *C4h*

Cu(H2O)4+ *D2h* #2


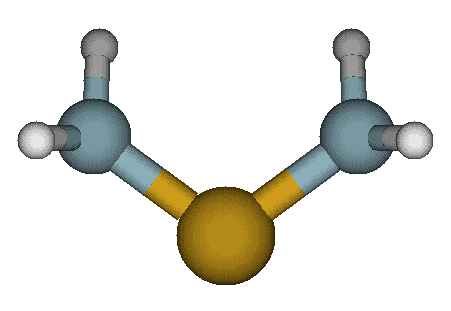


Cu(H2O)4+ *D2*

Cu(H2O)4+ *D2h*#1

Cu(H2O)4+ *D4h* #2

Cu(H2O)4+ *D2d* #3


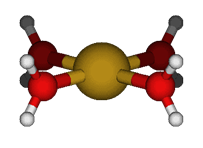

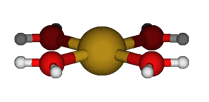

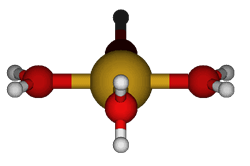

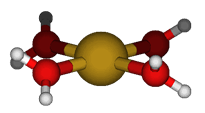

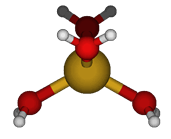

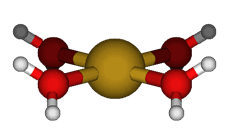

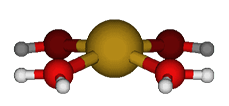

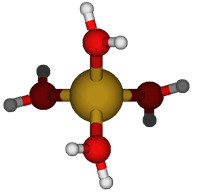

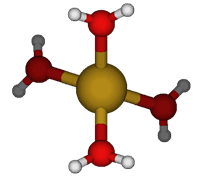

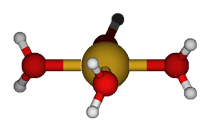

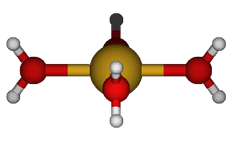

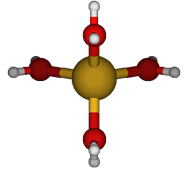

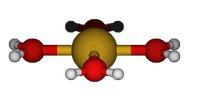


Cu(H2O)4+ *D2h* #3


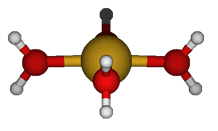


Cu(H2O)4+ *C4v* #2


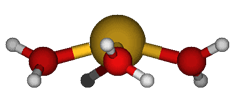


Cu(H2O)4+ *C4*


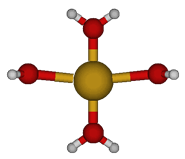


Cu(H2O)4+ *C2v* #4

Cu(H2O)4+ *C2v* #3

Cu(H2O)4+ *C2v* #2


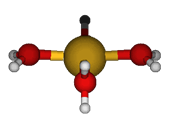

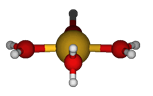


Cu(H2O)4+ *C2* #1

Cu(H2O)4+ *Cs* #1


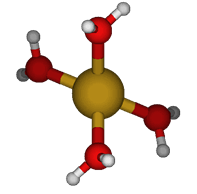

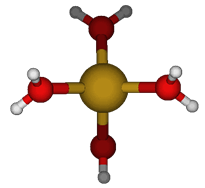

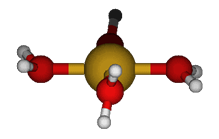


Cu(H2O)4+ *C2h* #1

Cu(H2O)4+ *C2h* #2


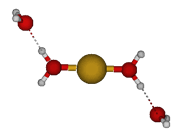

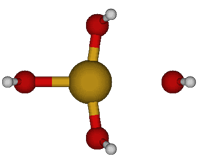


Cu(H2O)4+ *C2v* #1

Cu(H2O)4+ *S4* #2

Cu(H2O)4+ *C2h* #3


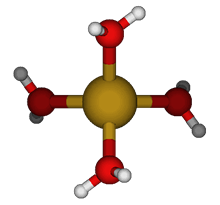

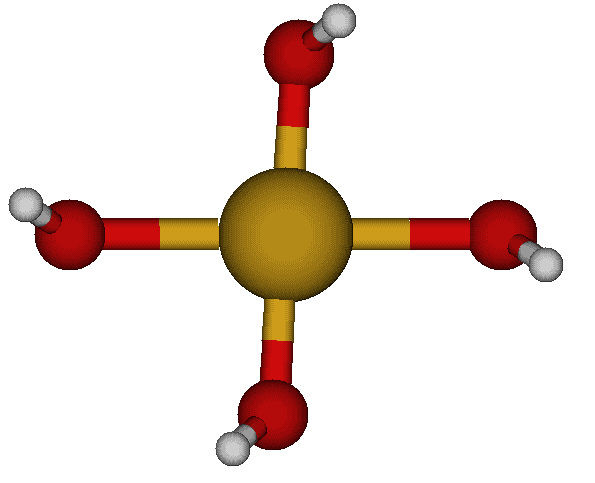


Cu(H2O)4+ *C2v* #5

Cu(H2O)4+ *C2v* #6


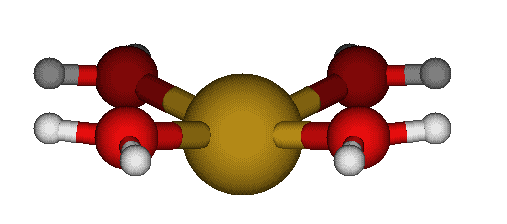

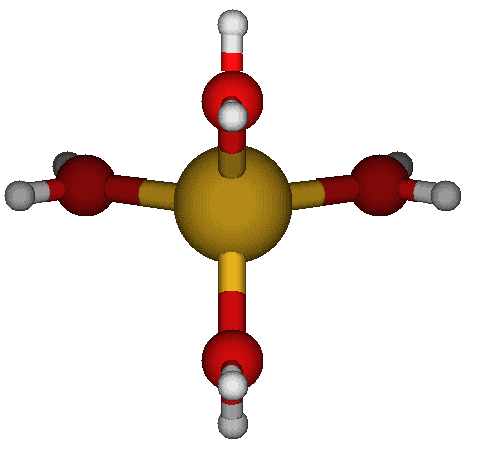


Cu(H2O)4+ *Ci* #1

Cu(H2O)4+ *Cs* #2


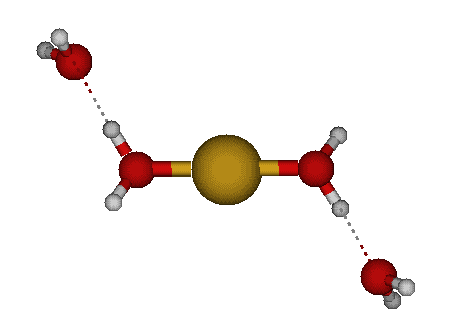

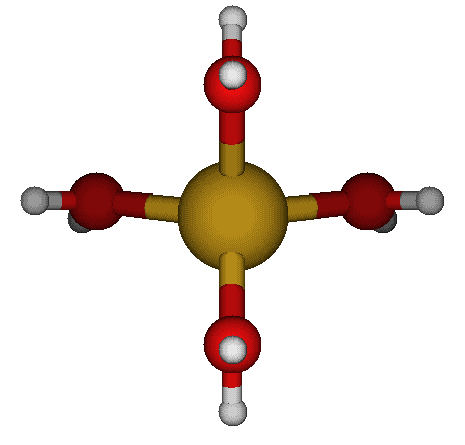

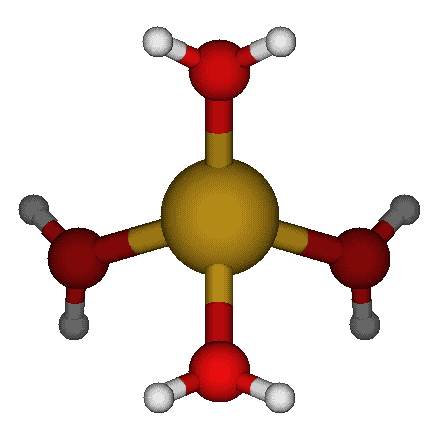


Cu(H2O)4+ *Cs* #5


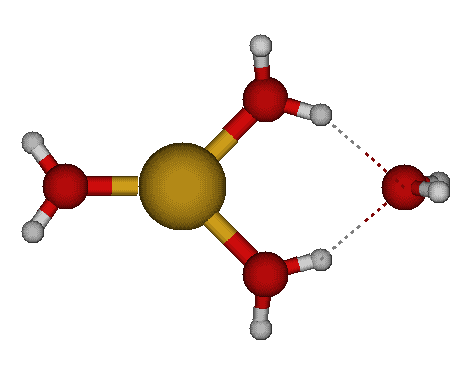


Cu(H2O)4+ *C2* #3

Cu(H2O)4+ *C2v* #14

Cu(H2O)4+ *Cs* #8


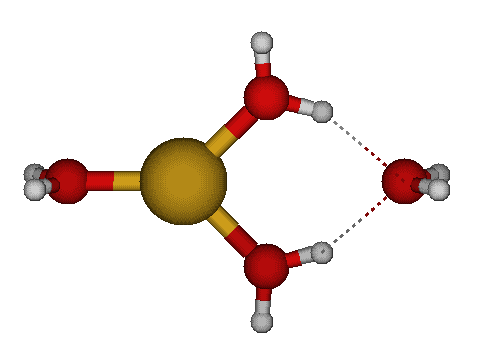

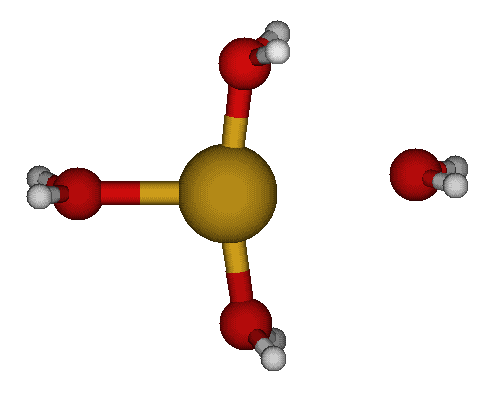


Cu(H2O)4+ *C2* #4

Cu(H2O)4+ *Cs* #9

Cu(H2O)4+ *Cs* #10


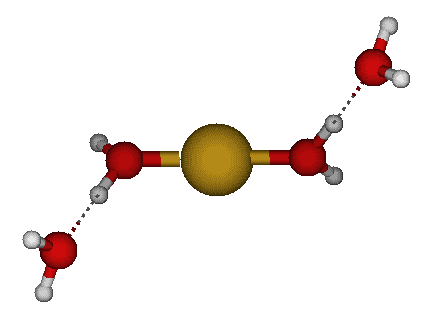

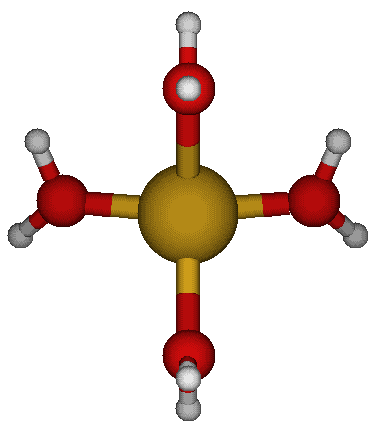

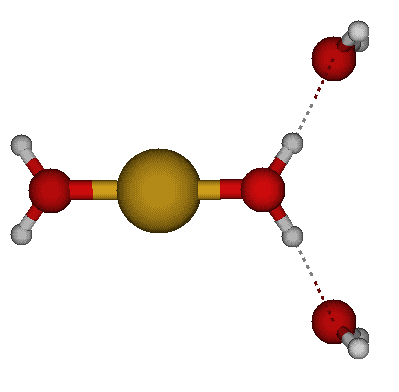


Cu(H2O)4+ *C1* #3

Cu(H2O)4+ *C1* #4

Cu(H2O)4+ *Cs* #11

Cu(H2O)4+ *Cs* #12

Cu(H2O)4+ *C2v* #12

Cu(H2O)4+ *C2v* #15

Cu(H2O)4+ *C2v* #16

Cu(H2O)4+ *C2v* #17

Cu(H2O)4+ *Cs* #15

Cu(H2O)4+ *C1* #8

Cu(H2O)4+ *C1* #9

Cu(H2O)4+ *C1* #10

Cu(H2O)4+ *C1* #13


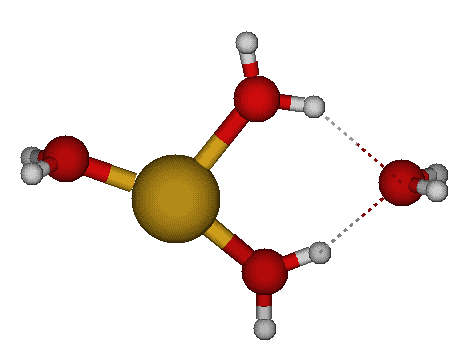

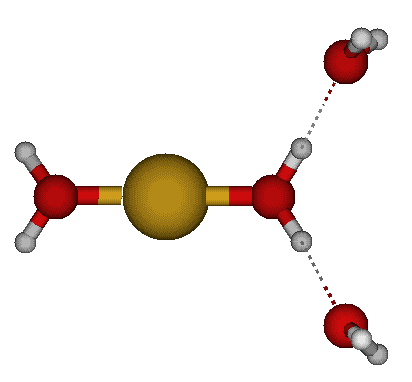

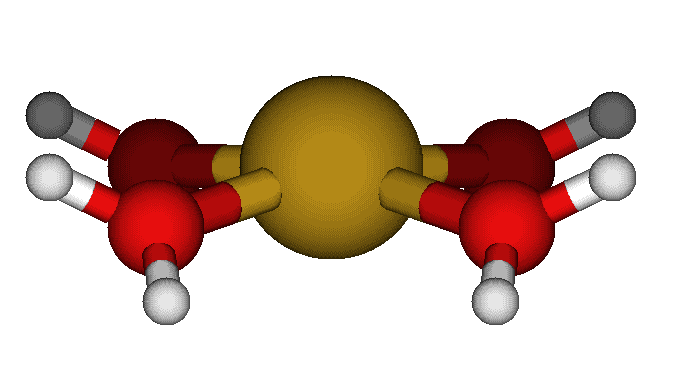

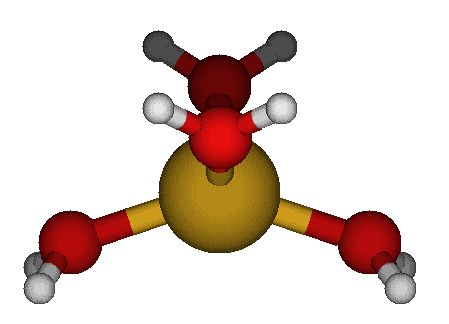

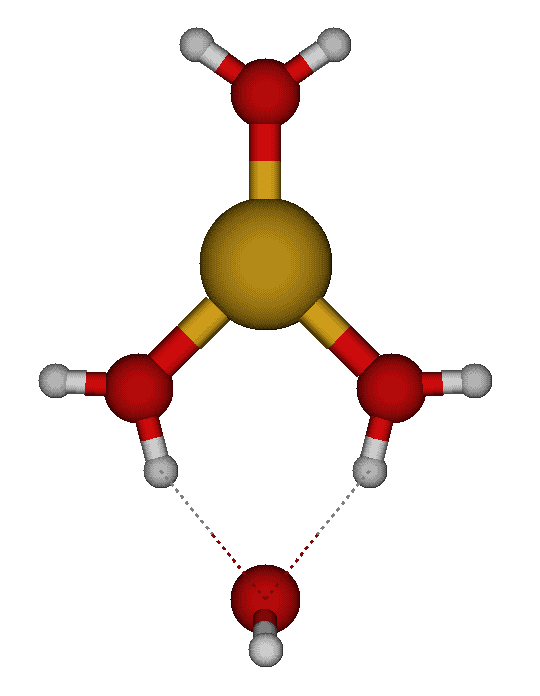

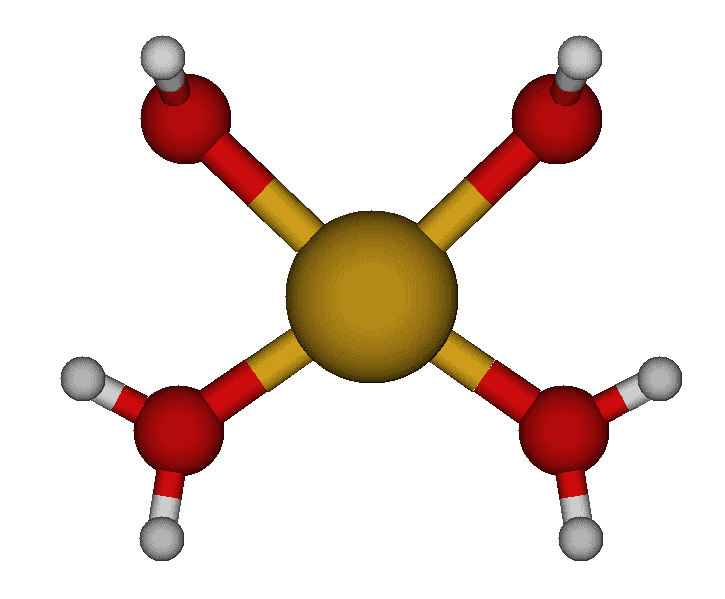

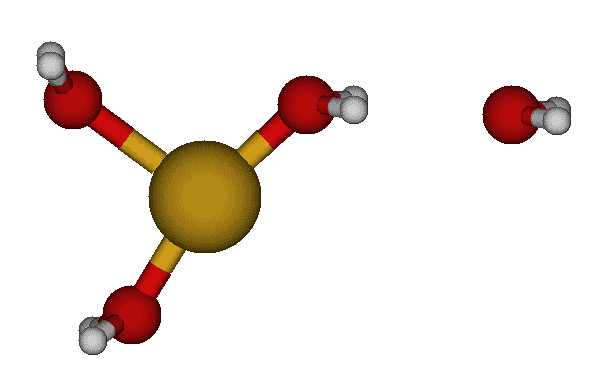

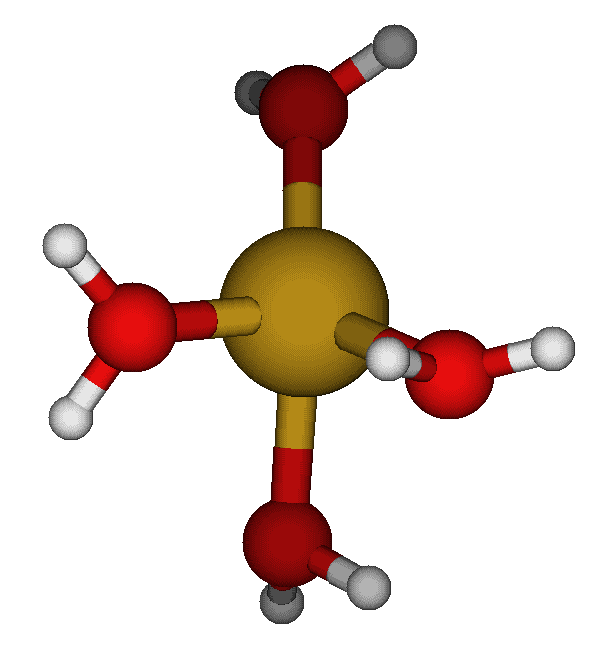

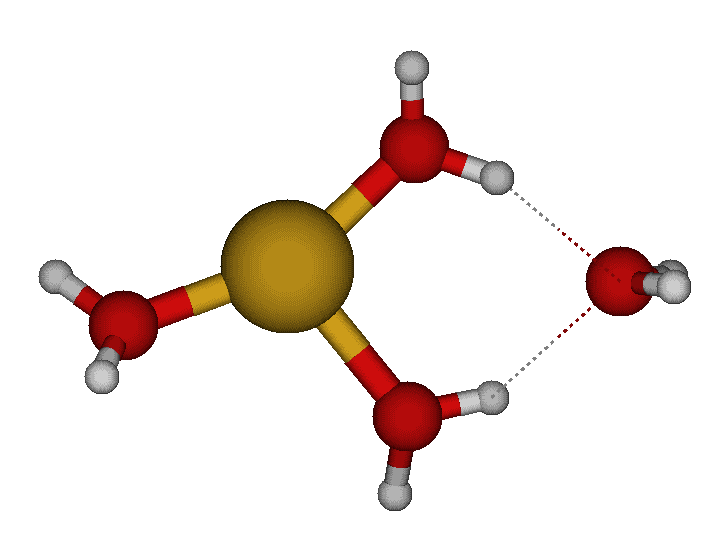

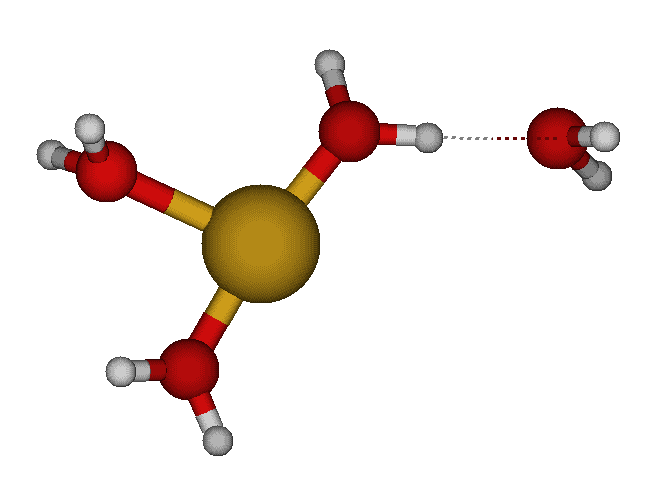

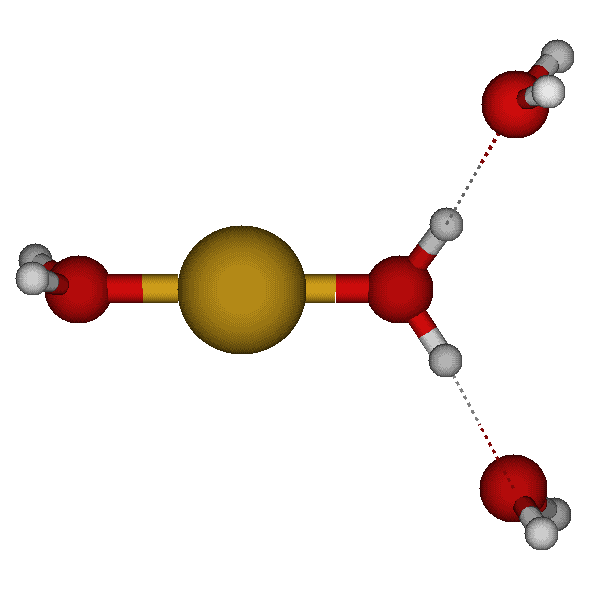

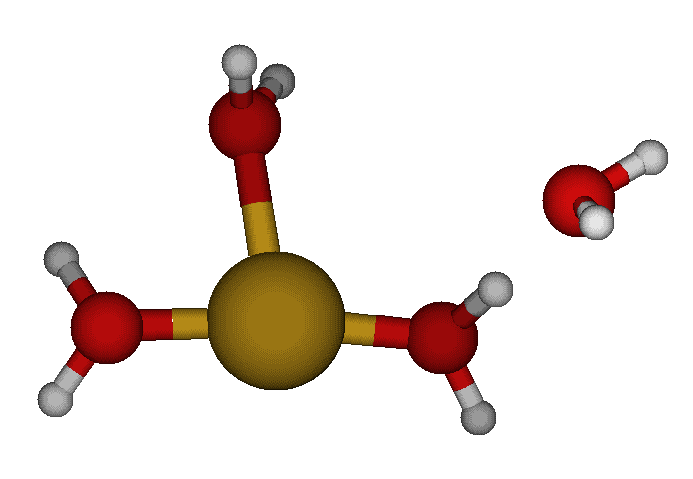

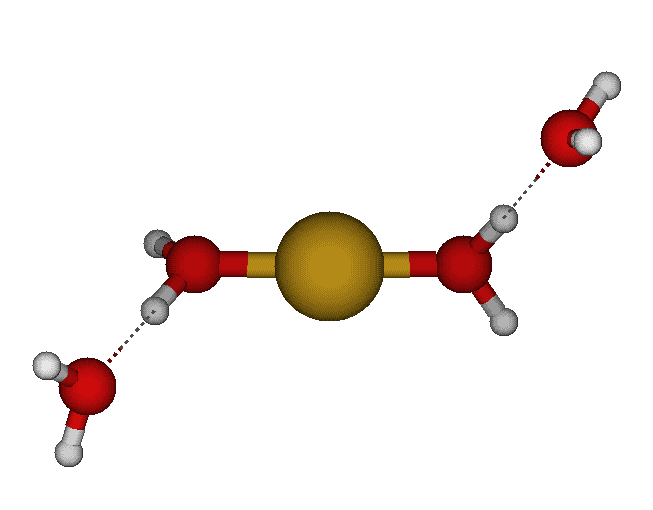


Cu(H2O)5+ *Cs* #5

Cu(H2O)4+1+ *C2* #1

Cu(H2O)5+ *C2v* #1

Cu(H2O)5+ *C2v* #2

Cu(H2O)5+ *C2v* #3
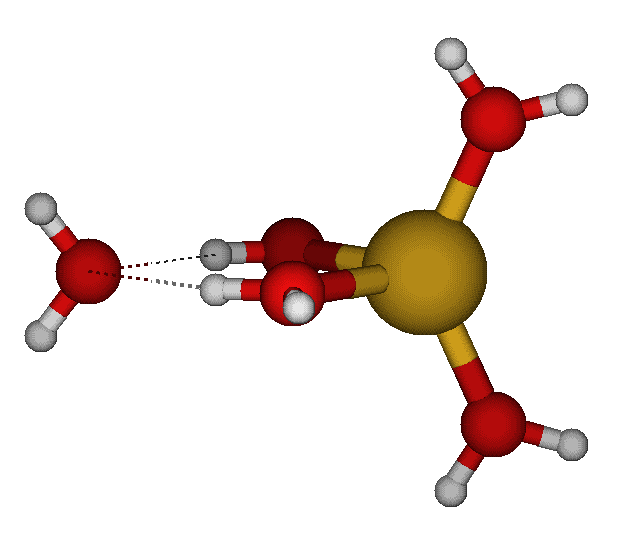

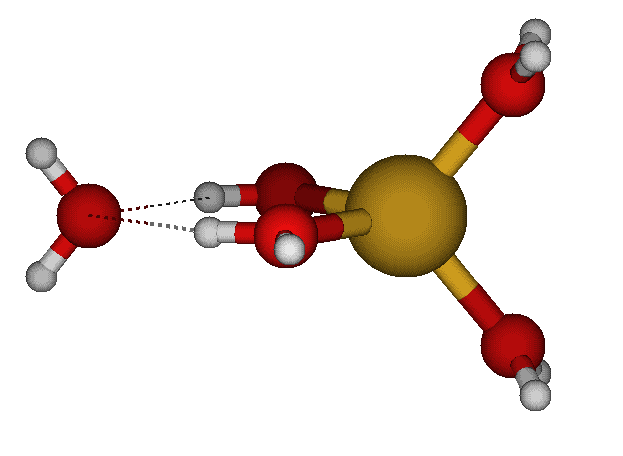

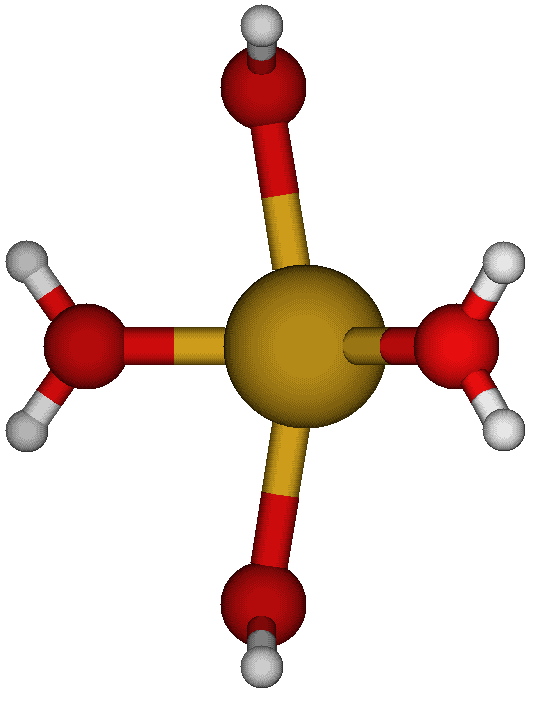

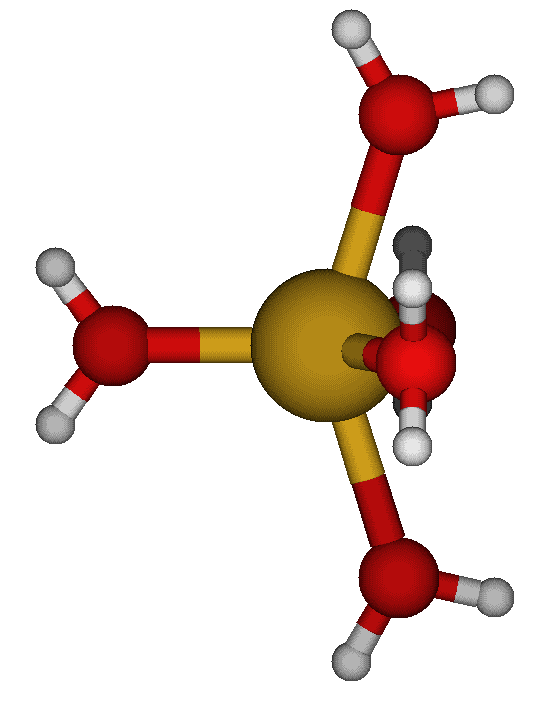

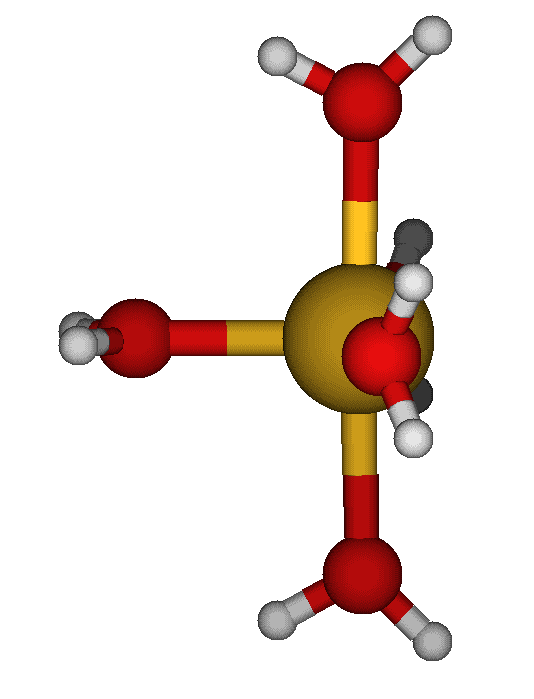


Cu(H2O)4+1+ *C2v* #1

Cu(H2O)4+1+ *C2v* #2

Cu(H2O)5+ *C2* #3

Cu(H2O)5+ *Cs* #1

Cu(H2O)4+1+ *Cs* #5

Cu(H2O)4+1+ *Cs* #6

Cu(H2O)6+ *Th*

Cu(H2O)6+ *S6*

Cu(H2O)6+ *C3* #1

Cu(H2O)6+ *C3h*

Cu(H2O)6+ *D2h*

Cu(H2O)2+4+ *D2d*


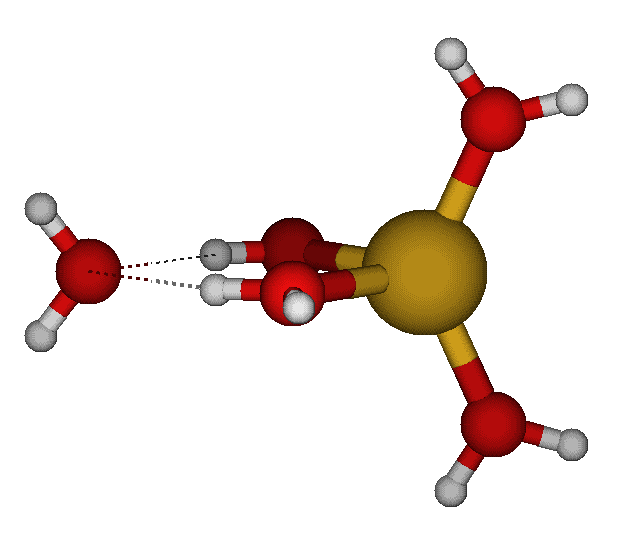

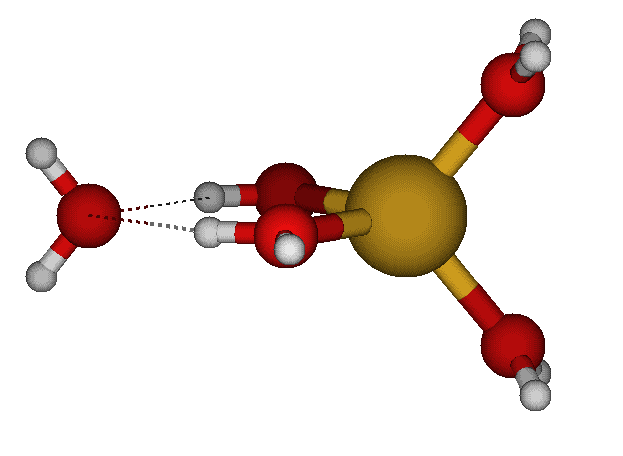

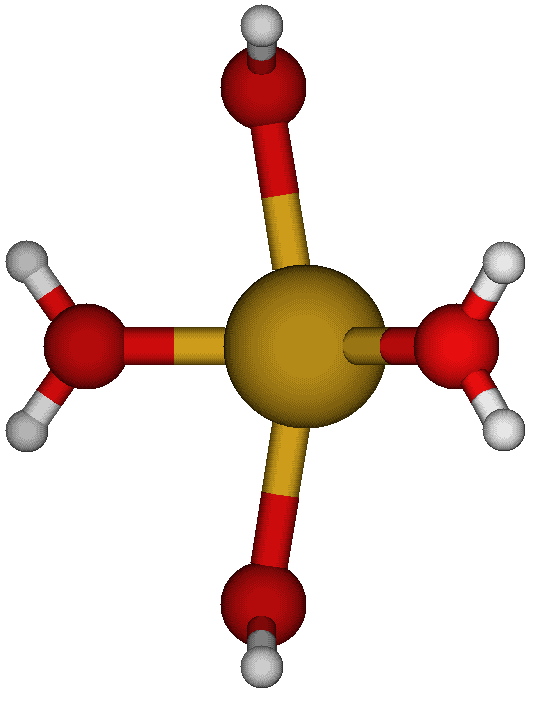

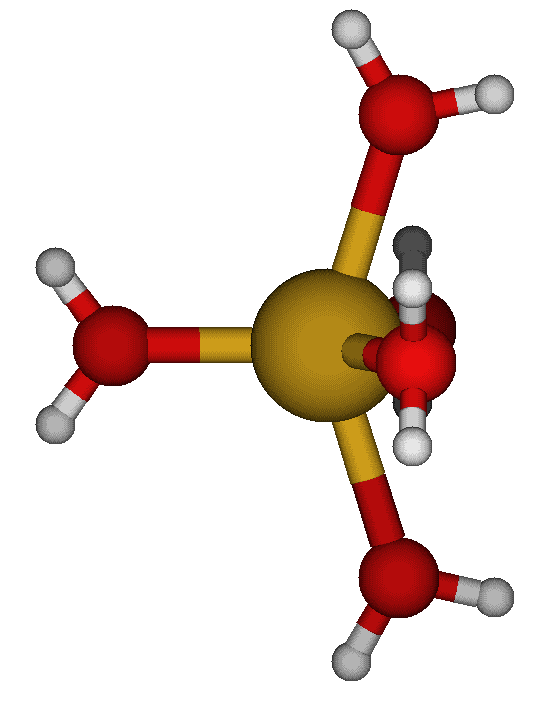

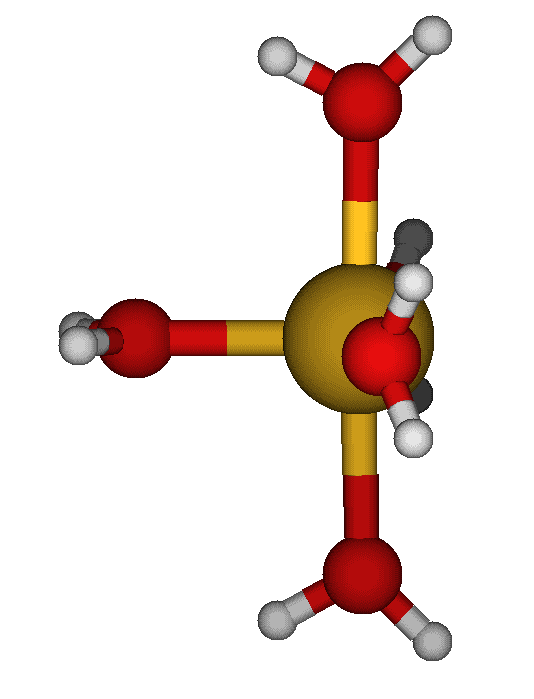

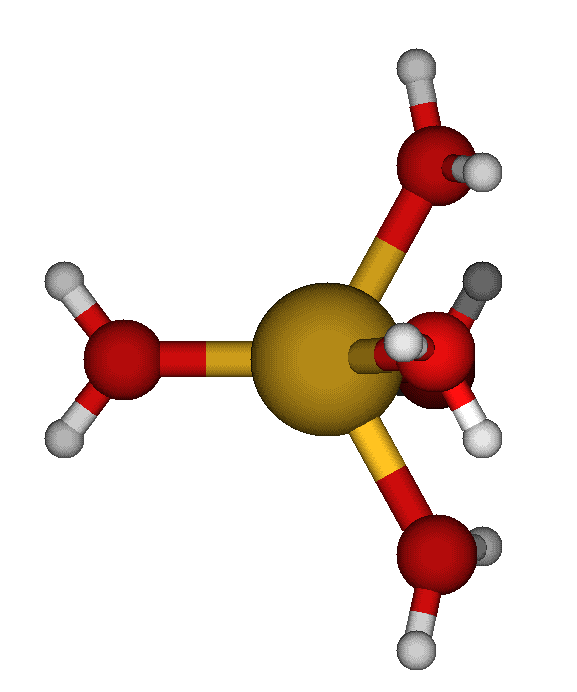

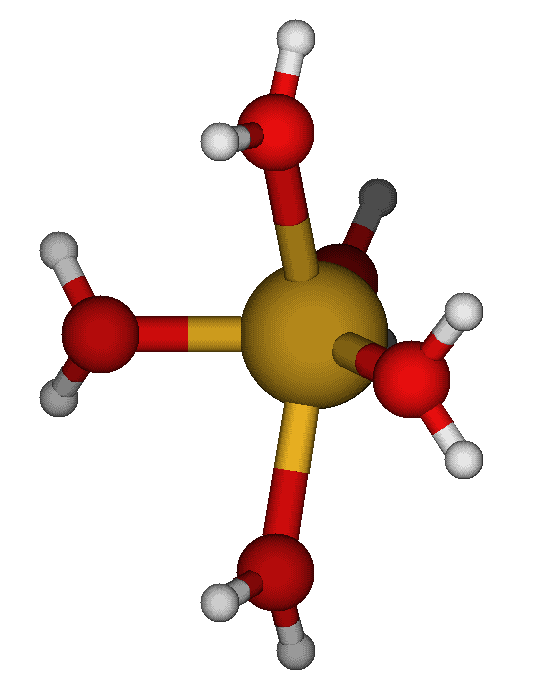

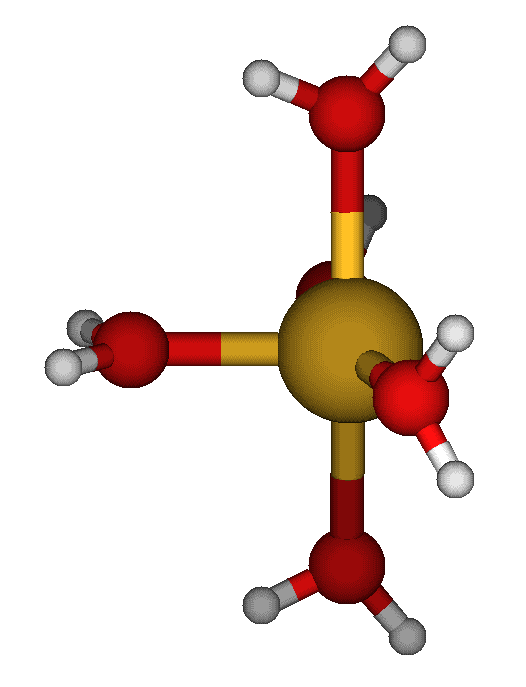

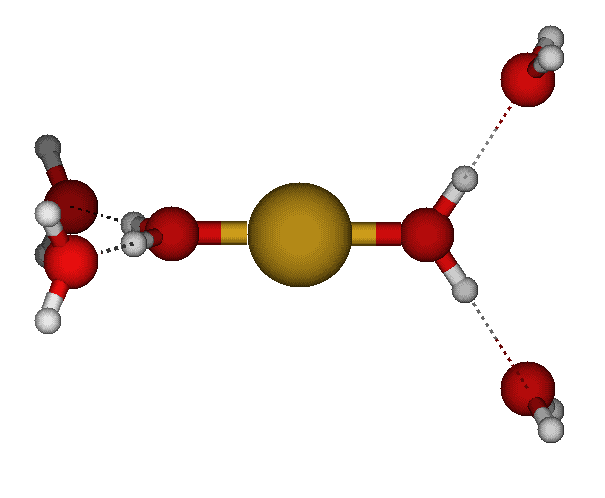

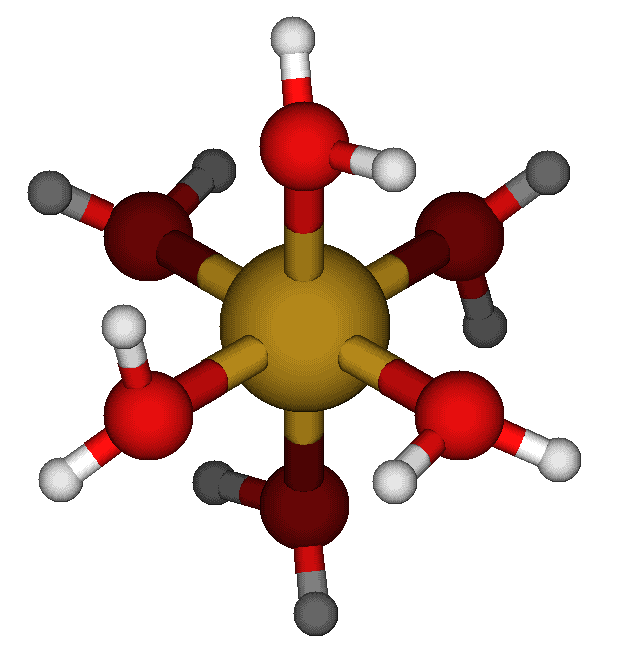

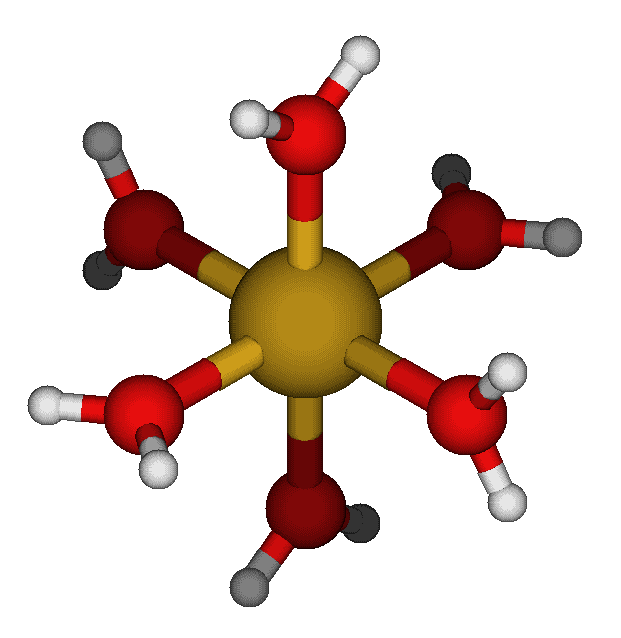

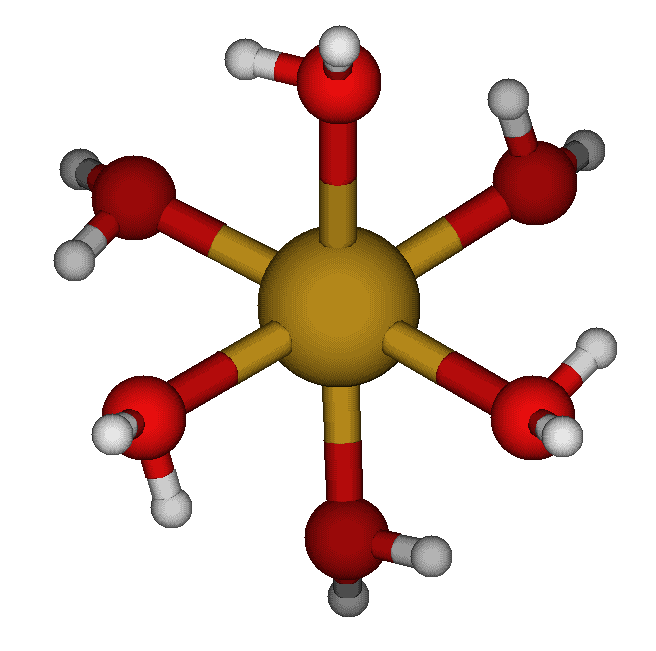

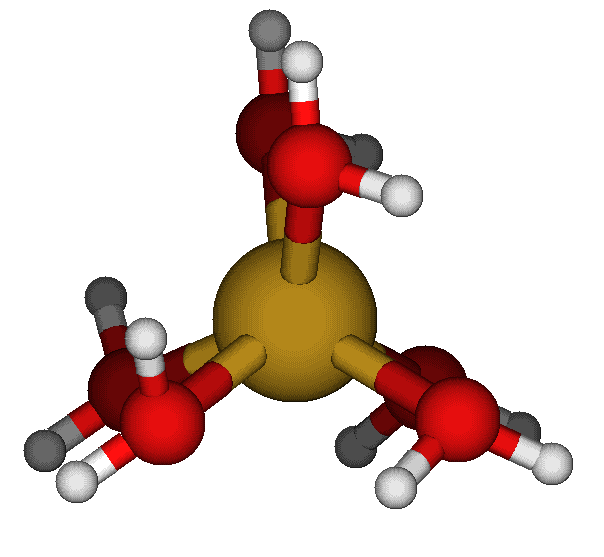

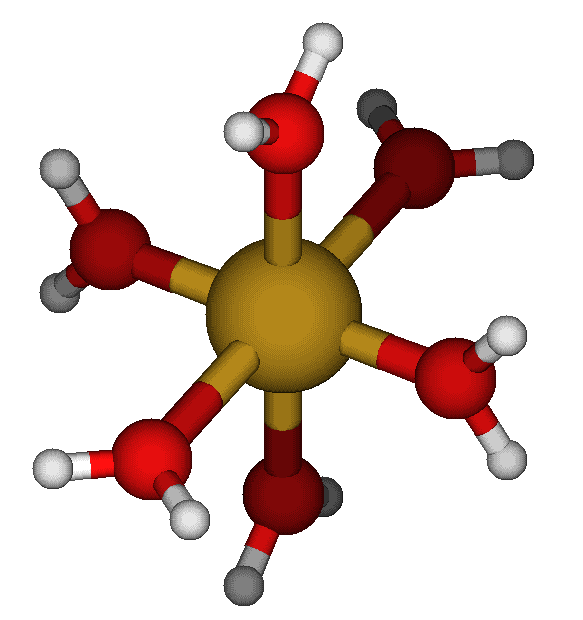

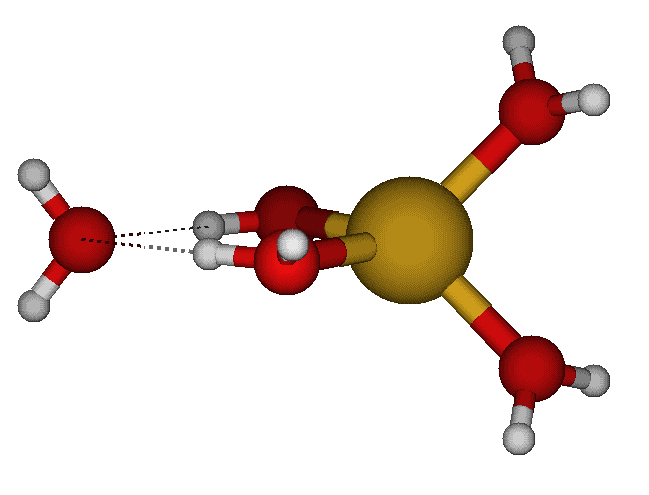

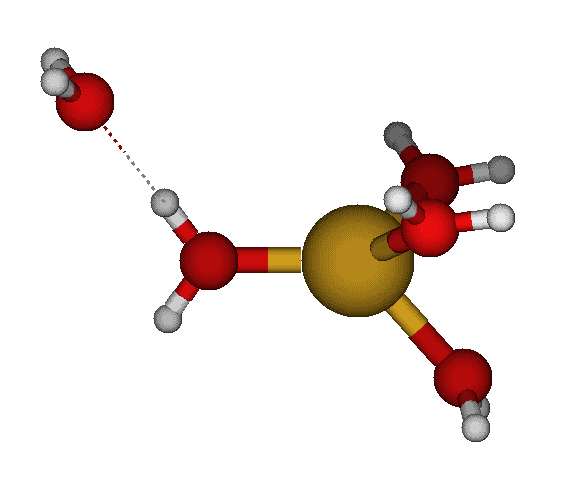

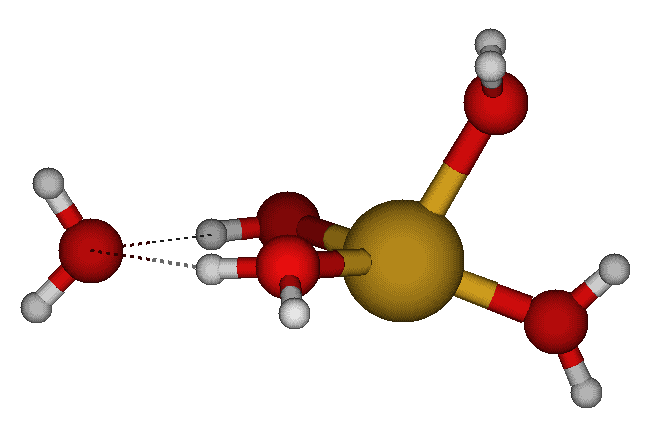


**Z-matrices of copper(I) aqua complexes and useful hints for running calculations with Z-matrices and simultaneously respecting symmetry.**

The 5 columns give the HF/6-31G*, HF/6-31+G*, MP2/6-31G*, MP2/6-31+G*, and B3LYP/6-31+G* optimized structures, respectively.

*Hint #1*. The first atom of the complex should be the central atom. If there is no central atom but plenty of symmetry, then the first atom should be a dummy atom which passes through as many symmetry elements as possible.

*Hint #2*. The second atom should be an atom on the principal axis of symmetry. If no such atom exists, then the second atom should be a dummy atom which passes through the principal axis. If there is no principal axis of symmetry, then the second atom should be a real or dummy atom in a plane of symmetry. The third atom should be on a non-principal axis of symmetry or in a symmetry plane.

Level HF HF MP2 MP2 B3LYP

Basis Set 6-31G* 6-31+G* 6-31G* 6-31+G* 6-31+G*

*CuAq1_+_C2v*

Cu

O1 Cu O1Cu

H1A O1 H1AO Cu H1AOCu

H1B O1 H1AO Cu H1AOCu H1A 180.0

O1Cu= 1.94408 2.06213 1.81210 1.93699 1.94052

H1AO= 0.95335 0.95366 0.97540 0.97751 0.97393

H1AOCu= 126.603 126.496 126.460 126.302 125.870

*CuAq2_+_D2d*

Cu

X*1 Cu 1.0

O1 Cu O1Cu X*1 90.0

H1A O1 H1AO Cu H1AOCu X*1 0.0

H1B O1 H1AO Cu H1AOCu X*1 180.0

O2 Cu O1Cu X*1 90.0 O1 180.0

H2A O2 H1AO Cu H1AOCu X*1 90.0

H2B O2 H1AO Cu H1AOCu X*1 -90.0

O1Cu= 1.92412 2.03350 1.81615 1.87035 1.90404

H1AO= 0.95247 0.95274 0.97441 0.97632 0.97255

H1AOCu= 126.241 1 26.365 126.057 125.946 125.715

(alternate Z-matrix for D2d)

Cu

X*1 Cu 1.0

O1 Cu O1Cu X*1 90.0

X*2 Cu 1.0 O1 90.0 X*1 180.0

H1A O1 H1AO Cu H1AOCu X*1 45.0

H1B O1 H1AO Cu H1AOCu X*2 45.0

O2 Cu O1Cu X*1 90.0 O1 180.0

H2A O2 H1AO Cu H1AOCu X*1 45.0

H2B O2 H1AO Cu H1AOCu X*2 45.0

*CuAq2_+_D2h*

Cu

X*1 Cu 1.0

O1 Cu O1Cu X*1 90.0

H1A O1 H1AO Cu H1AOCu X*1 0.0

H1B O1 H1AO Cu H1AOCu X*1 180.0

O2 Cu O1Cu X*1 90.0 O1 180.0

H2A O2 H1AO Cu H1AOCu X*1 0.0

H2B O2 H1AO Cu H1AOCu X*1 180.0

O1Cu= 1.92696 2.03570 1.82078 1.87430 1.90772

H1AO= 0.95244 0.95276 0.97426 0.97629 0.97248

H1AOCu= 126.286 126.390 126.127 125.986 125.744

The D2h Z-matrix can be obtained from the first D2d Z-matrix by changing two torsions.

*CuAq2_+_C2*

Cu

X*1 Cu 1.0

O1 Cu O1Cu X*1 O1CuX

H1A O1 H1AO Cu H1AOCu X*1 H1AOCuX

H1B O1 H1BO Cu H1BOCu X*1 H1BOCuX

O2 Cu O1Cu X*1 O1CuX O1 180.0

H2A O2 H1AO Cu H1AOCu X*1 H1AOCuX

H2B O2 H1BO Cu H1BOCu X*1 H1BOCuX

Initial Final

O1Cu= 1.81615 1.81637 1.87158 1.90532

H1AO= 0.97441 0.97452 0.97687 0.97297

H1BO= 0.97441 0.97449 0.97678 0.97290

O1CuX= 90.0 89.310 89.290 89.161

H1AOCu= 126.057 125.681 124.422 124.432

H1BOCu= 126.057 126.001 124.640 124.673

H1AOCuX= 45.0+10 49.509 55.927 54.889

H1BOCuX= -135.0-10 -139.416 -146.844 -145.674

The C2 Z-matrix can be obtained from the second D2d Z-matrix by removing the references to X*2, replacing these torsions by -135.0. We also start with the optimized parameters for the optimized D2d Z-matrix, replicating the lines and changing the variable name when necessary, and adding in missing angles and dihedrals, remembering to give the hydrogens a little twist and wag from the maximum in that coordinate (dihedral) by adding/subtracting 10.0. Only the correlated calculations needed to be run at this symmetry as the D2d structure was stable at the HF levels.

*CuAq2_+_Cs*

Cu

X*1 Cu 1.0

O1 Cu O1Cu X*1 90.0

H1A O1 H1AO Cu H1AOCu X*1 0.0

H1B O1 H1BO Cu H1BOCu X*1 180.0

O2 Cu O2Cu X*1 O2CuX O1 180.0

H2A O2 H2AO Cu H2AOCu X*1 H2AOCuX

H2B O2 H2AO Cu H2AOCu X*1 -H2AOCuX

Initial Final

O1Cu= 1.81614 1.81618 1.87010 1.90207

H1AO= 0.97441 0.97441 0.97629 0.97255

H1BO= 0.97441 0.97443 0.97638 0.97263

O2Cu= 1.81614 1.81631 1.87180 1.90354

H2AO= 0.97441 0.97448 0.97681 0.97287

H1AOCu= 126.057 126.191 126.058 125.813

H1BOCu= 126.057 125.923 125.845 125.659

O2CuX= 90.0 90.823 90.999 90.814

H2AOCu= 126.057 125.906 124.529 124.708

H2AOCuX= 90.0-10 86.205 78.641 80.401

The Cs Z-matrix can be obtained from the first D2d Z-matrix by unfixing the final hydrogen torsions. We also start with the optimized parameters for the optimized D2d Z-matrix, replicating the lines and changing the variable name when necessary, and adding in missing angles and dihedrals, remembering to give the hydrogens a little wag from the maximum in that coordinate (dihedral) by subtracting 10.0. Only the correlated calculations needed to be run at this symmetry as the D2d structure was stable at the HF levels.

*CuAq3_+_D3h_1*

Cu

X*1 Cu 1.0

O1 Cu O1Cu X*1 90.0

H1A O1 H1AO Cu H1AOCu X*1 0.0

H1B O1 H1AO Cu H1AOCu X*1 180.0

O2 Cu O1Cu X*1 90.0 O1 120.0

H2A O2 H1AO Cu H1AOCu X*1 0.0

H2B O2 H1AO Cu H1AOCu X*1 180.0

O3 Cu O1Cu X*1 90.0 O1 -120.0

H3A O3 H1AO Cu H1AOCu X*1 0.0

H3B O3 H1AO Cu H1AOCu X*1 180.0

O1Cu= 2.07768 2.16196 1.97320 2.04594 2.06295

H1AO= 0.95091 0.95126 0.97281 0.97461 0.97121

H1AOCu= 126.807 126.633 127.099 126.684 126.435

The two different D3h structures only differ by the fixed torsion angle of the hydrogens, with the first structure having the hydrogens in the σv planes and the second in the σh plane.

*CuAq3_+_D3h_2*

Cu

X*1 Cu 1.0

O1 Cu O1Cu X*1 90.0

H1A O1 H1AO Cu H1AOCu X*1 90.0

H1B O1 H1AO Cu H1AOCu X*1 -90.0

O2 Cu O1Cu X*1 90.0 O1 120.0

H2A O2 H1AO Cu H1AOCu X*1 90.0

H2B O2 H1AO Cu H1AOCu X*1 -90.0

O3 Cu O1Cu X*1 90.0 O1 -120.0

H3A O3 H1AO Cu H1AOCu X*1 90.0

H3B O3 H1AO Cu H1AOCu X*1 -90.0

O1Cu= 2.05595 2.15075 1.94146 2.02336 2.04365

H1AO= 0.95071 0.95125 0.97256 0.97450 0.97105

H1AOCu= 126.896 126.688 127.314 126.805 126.591

The D3 structure only has one additional parameter, the hydrogen torsion, and can be derived from either D3h structure by adding a second dummy atom opposite to the first one and referencing the appropriate hydrogen torsion to the appropriate dummy atom. This structure is the minimum energy structure at the Hartree-Fock levels.

*CuAq3_+_D3*

Cu

X*1 Cu 1.0

O1 Cu O1Cu X*1 90.0

X*2 Cu 1.0 O1 90.0 X*1 180.0

H1A O1 H1AO Cu H1AOCu X*1 H1AOCuX

H1B O1 H1AO Cu H1AOCu X*2 H1AOCuX

O2 Cu O1Cu X*1 90.0 O1 120.0

H2A O2 H1AO Cu H1AOCu X*1 H1AOCuX

H2B O2 H1AO Cu H1AOCu X*2 H1AOCuX

O3 Cu O1Cu X*1 90.0 O1 -120.0

H3A O3 H1AO Cu H1AOCu X*1 H1AOCuX

H3B O3 H1AO Cu H1AOCu X*2 H1AOCuX

O1Cu= 2.05805 2.15018 1.94345 2.02640 2.04627

H1AO= 0.95083 0.95138 0.97262 0.97474 0.97124

H1AOCu= 126.762 126.568 127.195 126.628 126.395

H1AOCuX= 58.781 51.852 69.250 55.850 54.353

For the two C2v structures, they can be derived from the D3h structure by first making O2 and O3 different from O1 in their parameters and allowing the angle to deviate from 120.0. After making the hydrogens on O2 and O3 different than O1, and redefining the hydrogen torsions on O2 and O3, the appropriate hydrogens are then twisted.

*CuAq3_+_C2v_1*

Cu

X*1 Cu 1.0

O1 Cu O1Cu X*1 90.0

H1A O1 H1AO Cu H1AOCu X*1 90.0

H1B O1 H1AO Cu H1AOCu X*1 -90.0

O2 Cu O2Cu X*1 90.0 O1 O2CuXO

H2A O2 H2AO Cu H2AOCu O1 H2AOCuO

H2B O2 H2AO Cu H2AOCu O1 -H2AOCuO

O3 Cu O2Cu X*1 90.0 O1 -O2CuXO

H3A O3 H2AO Cu H2AOCu O1 H2AOCuO

H3B O3 H2AO Cu H2AOCu O1 -H2AOCuO

O1Cu= 2.04630 2.15031 1.88027 2.16813 2.15865

H1AO= 0.95076 0.95122 0.97262 0.97498 0.97135

O2Cu= 2.07744 2.15609 1.99321 1.95849 2.00148

H2AO= 0.95098 0.95141 0.97298 0.97676 0.97253

H1AOCu= 126.659 126.509 126.752 126.841 126.561

H2AOCu= 126.683 126.433 127.046 120.361 120.956

O2CuXO= 120.019 116.857 129.009 98.096 101.627

H2AOCuO= 92.903 93.919 87.311 112.312 110.754

*CuAq3_+_C2v_2*

Cu

X*1 Cu 1.0

O1 Cu O1Cu X*1 90.0

H1A O1 H1AO Cu H1AOCu X*1 0.0

H1B O1 H1AO Cu H1AOCu X*1 180.0

O2 Cu O2Cu X*1 90.0 O1 O2CuXO

H2A O2 H2AO Cu H2AOCu O1 0.0

H2B O2 H2BO Cu H2BOCu O1 180.0

O3 Cu O2Cu X*1 90.0 O1 -O2CuXO

H3A O3 H2AO Cu H2AOCu O1 0.0

H3B O3 H2BO Cu H2BOCu O1 180.0

O1Cu= 2.08698 2.18052 2.14597 2.28101 2.26041

H1AO= 0.95106 0.95140 0.97459 0.97568 0.97197

O2Cu= 2.04509 2.13466 1.84571 1.91413 1.95405

H2AO= 0.95082 0.95136 0.97229 0.97473 0.97119

H2BO= 0.95065 0.95127 0.97228 0.97476 0.97098

H1AOCu= 126.781 126.621 127.586 127.201 126.884

H2AOCu= 125.394 125.071 124.666 123.865 123.991

H2BOCu= 128.090 128.022 127.548 128.112 127.723

O2CuXO= 117.224 114.829 97.148 96.354 99.131

For the C2 structure (MP2, B3LYP), the initial structure was taken from the C2v #2 structure (the lowest in energy among the two C2v and D3 forms). The atoms were rearranged so that the skeletal atoms came first and the dummy atom removed. The appropriate hydrogens are then twisted by 20 degrees at all levels.

For the Cs #1 structure (MP2, B3LYP), the initial structure was taken from the C2v #2 structure (the lowest in energy among the two C2v and D3 forms). H1A and H1B were made non-equivalent, the O2CuX angle was added, and the H2AOCuO and H2BOCuO dihedral angles were added.

*CuAq3_+_C2*

Cu

O1 Cu O1Cu

O2 Cu O2Cu O1 O2CuO

O3 Cu O2Cu O1 O2CuO O2 180.0

H1A O1 H1AO Cu H1AOCu O2 H1AOCuO

H1B O1 H1AO Cu H1AOCu O3 H1AOCuO

H2A O2 H2AO Cu H2AOCu O1 H2AOCuO

H2B O2 H2BO Cu H2BOCu O1 H2BOCuO

H3A O3 H2AO Cu H2AOCu O1 H2AOCuO

H3B O3 H2BO Cu H2BOCu O1 H2BOCuO

Initial

O1Cu= 2.14597 2.15026 2.28241 2.27193

H1AO= 0.97459 0.97463 0.97575 0.97204

O2Cu= 1.84571 1.84520 1.91568 1.95472

H2AO= 0.97229 0.97317 0.97600 0.97201

H2BO= 0.97228 0.97306 0.97589 0.97167

O2CuO= 97.148 95.587 95.507 97.998

H1AOCu= 127.586 127.580 127.186 126.913

H2AOCu= 124.666 122.051 120.177 121.076

H2BOCu= 127.548 125.470 124.114 124.852

H1AOCuO= 70.0 71.455 69.561 75.632

H2AOCuO= 20.0 26.744 31.147 24.042

H2BOCuO= -160.0 -181.861 -185.140 172.510

*CuAq3_+_Cs #1*

Cu

X*1 Cu 1.0

O1 Cu O1Cu X*1 90.0

H1A O1 H1AO Cu H1AOCu X*1 0.0

H1B O1 H1BO Cu H1BOCu X*1 180.0

O2 Cu O2Cu X*1 O2CuX O1 O2CuXO

H2A O2 H2AO Cu H2AOCu O1 H2AOCuO

H2B O2 H2BO Cu H2BOCu O1 H2BOCuO

O3 Cu O2Cu X*1 O2CuX O1 -O2CuXO

H3A O3 H2AO Cu H2AOCu O1 -H2AOCuO

H3B O3 H2BO Cu H2BOCu O1 -H2BOCuO

Initial

O1Cu= 2.14597 2.15322 2.29087 2.25498

H1AO= 0.97459 0.97470 0.97571 0.97197

H1BO= 0.97459 0.97470 0.97581 0.97206

O2Cu= 1.84571 1.84474 1.91370 1.95525

H2AO= 0.97229 0.97289 0.97537 0.97132

H2BO= 0.97226 0.97285 0.97537 0.97109

H1AOCu= 127.586 129.751 129.403 127.431

H1BOCu= 127.586 125.469 125.059 126.352

O2CuX= 90.0 92.684 91.450 90.765

H2AOCu= 124.666 122.867 121.776 123.546

H2BOCu= 127.548 126.174 125.959 127.194

O2CuXO= 97.147 96.192 95.851 99.226

H2AOCuO= 20.0 14.484 14.895 7.353

H2BOCuO= 160.0 170.712 167.606 174.149

For the Cs #2 structure (MP2,B3LYP), the initial structure was taken from the C2v #2 structure (the lowest in energy among the two C2v and D3 forms). The atoms were rearranged so that the skeletal atoms came first and the dummy atom removed. All skeletal atoms are in the symmetry plane, but O2 and O3 are no longer equivalent. H1A and H1B remain symmetry-equivalent, but their dihedrals can now vary. The hydrogens on O2 and O3 are still in the plane but are not equivalent to each other.

*CuAq3_+_Cs #2*

Cu

O1 Cu O1Cu

O2 Cu O2Cu O1 O2CuO

O3 Cu O3Cu O1 O3CuO O2 180.0

H1A O1 H1AO Cu H1AOCu O2 H1AOCuO

H1B O1 H1AO Cu H1AOCu O2 -H1AOCuO

H2A O2 H2AO Cu H2AOCu O1 0.0

H2B O2 H2BO Cu H2BOCu O1 180.0

H3A O3 H3AO Cu H3AOCu O1 0.0

H3B O3 H3BO Cu H3BOCu O1 180.0

Initial

O1Cu= 2.14597 2.14659 2.30265 2.27544

O2Cu= 1.84571 1.85446 1.92103 1.96055

O3Cu= 1.84571 1.84752 1.91014 1.94669

H1AO= 0.97459 0.97457 0.97605 0.97227

H2AO= 0.97229 0.97245 0.97527 0.97154

H2BO= 0.97228 0.97197 0.97435 0.97060

H3AO= 0.97229 0.97238 0.97465 0.97114

H3BO= 0.97228 0.97243 0.97506 0.97127

O2CuO= 97.148-10 88.853 83.402 86.716

O3CuO= 97.148+10 109.012 111.491 112.413

H1AOCu= 127.586 126.566 124.583 124.614

H2AOCu= 124.666 122.585 120.168 120.734

H2BOCu= 127.548 129.314 131.106 130.455

H3AOCu= 124.666 126.993 126.419 126.073

H3BOCu= 127.548 125.644 125.879 125.858

H1AOCuO= 90.0 99.434 105.110 104.041

For the C1 structure (MP2, B3LYP), the initial structure was taken from the C2 structure (the lowest in energy at B3LYP among the two Cs and C2 forms). The atoms were rearranged so that the skeletal atoms came first and the dummy atom removed. All skeletal atoms are in the symmetry plane, but O2 and O3 are no longer equivalent. H1A and H1B remain symmetry-equivalent, but their dihedrals can now vary. The hydrogens on O2 and O3 are still in the plane but are not equivalent to each other.

*CuAq3_+_C1*

Cu

O1 Cu O1Cu

O2 Cu O2Cu O1 O2CuO

O3 Cu O3Cu O1 O3CuO O2 O3CuOO

H1A O1 H1AO Cu H1AOCu O2 H1AOCuO

H1B O1 H1BO Cu H1BOCu O3 H1BOCuO

H2A O2 H2AO Cu H2AOCu O1 H2AOCuO

H2B O2 H2BO Cu H2BOCu O1 H2BOCuO

H3A O3 H3AO Cu H3AOCu O1 H3AOCuO

H3B O3 H3BO Cu H3BOCu O1 H3BOCuO

Initial

O1Cu= 2.15026 2.15155 2.32977 2.31286

O2Cu= 1.84520 1.84845 1.91709 1.95611

O3Cu= 1.84520 1.84593 1.90908 1.94558

H1AO= 0.97463 0.97468 0.97615 0.97245

H1BO= 0.97463 0.97455 0.97612 0.97234

H2AO= 0.97317 0.97309 0.97675 0.97266

H2BO= 0.97306 0.97271 0.97542 0.97130

H3AO= 0.97317 0.97315 0.97611 0.97210

H3BO= 0.97306 0.97315 0.97633 0.97211

O2CuO= 95.589-10 90.453 81.855 84.184

O3CuO= 95.589+10 102.683 109.616 110.891

H1AOCu= 127.580 127.231 124.896 124.521

H1BOCu= 127.580 127.024 123.672 124.194

H2AOCu= 122.051 121.103 116.117 116.861

H2BOCu= 125.470 126.816 126.924 127.259

H3AOCu= 122.051 123.828 122.091 122.757

H3BOCu= 125.470 124.286 121.906 122.841

O3CuOO= 180.0 179.268 179.115 178.772

H1AOCuO= 71.455 79.697 90.178 92.053

H1BOCuO= 71.455 66.223 57.402 60.855

H2AOCuO= 26.744 21.658 19.644 17.651

H2BOCuO= -181.861 -184.921 -197.251 163.680

H3AOCuO= 26.744 28.928 45.639 34.416

H3BOCuO= -181.861 -178.819 -171.965 181.466

*CuAq4_+_D4h #1*

Cu

X*1 Cu 1.0

O1 Cu O1Cu X*1 90.0

H1A O1 H1AO Cu H1AOCu X*1 0.0

H1B O1 H1AO Cu H1AOCu X*1 180.0

O2 Cu O1Cu X*1 90.0 O1 90.0

H2A O2 H1AO Cu H1AOCu X*1 0.0

H2B O2 H1AO Cu H1AOCu X*1 180.0

O3 Cu O1Cu X*1 90.0 O1 180.0

H3A O3 H1AO Cu H1AOCu X*1 0.0

H3B O3 H1AO Cu H1AOCu X*1 180.0

O4 Cu O1Cu X*1 90.0 O1 -90.0

H4A O4 H1AO Cu H1AOCu X*1 0.0

H4B O4 H1AO Cu H1AOCu X*1 180.0

O1Cu= 2.18191 2.27892 2.07572 2.16830 2.18170

H1AO= 0.94995 0.95020 0.97267 0.97404 0.97074

H1AOCu= 127.033 126.811 127.512 127.086 126.798

*CuAq4_+_D4h #2*

Cu

X*1 Cu 1.0

O1 Cu O1Cu X*1 90.0

H1A O1 H1AO Cu H1AOCu X*1 90.0

H1B O1 H1AO Cu H1AOCu X*1 -90.0

O2 Cu O1Cu X*1 90.0 O1 90.0

H2A O2 H1AO Cu H1AOCu X*1 90.0

H2B O2 H1AO Cu H1AOCu X*1 -90.0

O3 Cu O1Cu X*1 90.0 O1 180.0

H3A O3 H1AO Cu H1AOCu X*1 90.0

H3B O3 H1AO Cu H1AOCu X*1 -90.0

O4 Cu O1Cu X*1 90.0 O1 -90.0

H4A O4 H1AO Cu H1AOCu X*1 90.0

H4B O4 H1AO Cu H1AOCu X*1 -90.0

O1Cu= 2.16684 2.27258 2.05572 2.16766 2.18028

H1AO= 0.94979 0.95020 0.97283 0.97420 0.97079

H1AOCu= 127.337 127.090 128.043 127.582 127.306

The two different D4h structures only differ by the fixed torsion angle of the hydrogens, with the first structure having the hydrogens in the σv planes and the second in the σh plane.

The D4 structure only has one additional parameter, the hydrogen torsion, and can be derived from either D4h structure by adding a second dummy atom opposite to the first one and referencing the appropriate hydrogen torsion to the appropriate dummy atom. The initial torsion was set to 70 degrees.

The D2h #1 structure is derived from either D4h structure by making a trans pair of oxygen atoms and their hydrogens different from the other pair, and rotating these hydrogens by 90 degrees.

*CuAq4_+_D4*

Cu

X*1 Cu 1.0

O1 Cu O1Cu X*1 90.0

X*2 Cu 1.0 O1 90.0 X*1 180.0

H1A O1 H1AO Cu H1AOCu X*1 H1AOCuX

H1B O1 H1AO Cu H1AOCu X*2 H1AOCuX

O2 Cu O1Cu X*1 90.0 O1 90.0

H2A O2 H1AO Cu H1AOCu X*1 H1AOCuX

H2B O2 H1AO Cu H1AOCu X*2 H1AOCuX

O3 Cu O1Cu X*1 90.0 O1 180.0

H3A O3 H1AO Cu H1AOCu X*1 H1AOCuX

H3B O3 H1AO Cu H1AOCu X*2 H1AOCuX

O4 Cu O1Cu X*1 90.0 O1 -90.0

H4A O4 H1AO Cu H1AOCu X*1 H1AOCuX

H4B O4 H1AO Cu H1AOCu X*2 H1AOCuX

O1Cu= 2.15580 2.25323 2.04708 2.14618 2.16098

H1AO= 0.95001 0.95046 0.97296 0.97462 0.97118

H1AOCu= 126.764 126.583 127.220 126.799 126.561

H1AOCuX= 49.549 48.893 49.587 47.107 46.652

*CuAq4_+_D2h #1*

Cu

X*1 Cu 1.0

O1 Cu O1Cu X*1 90.0

H1A O1 H1AO Cu H1AOCu X*1 0.0

H1B O1 H1AO Cu H1AOCu X*1 180.0

O2 Cu O2Cu X*1 90.0 O1 90.0

H2A O2 H2AO Cu H2AOCu X*1 90.0

H2B O2 H2AO Cu H2AOCu X*1 -90.0

O3 Cu O1Cu X*1 90.0 O1 180.0

H3A O3 H1AO Cu H1AOCu X*1 0.0

H3B O3 H1AO Cu H1AOCu X*1 180.0

O4 Cu O2Cu X*1 90.0 O1 -90.0

H4A O4 H2AO Cu H2AOCu X*1 90.0

H4B O4 H2AO Cu H2AOCu X*1 -90.0

O1Cu= 2.26695 2.34942 2.32240 2.44108 2.43912

H1AO= 0.95055 0.95074 0.97405 0.97527 0.97187

O2Cu= 2.06034 2.16922 1.85966 1.93829 1.97251

H2AO= 0.94949 0.95017 0.97129 0.97391 0.97021

H1AOCu= 127.063 126.797 127.868 127.428 127.162

H2AOCu= 126.273 126.246 125.788 125.736 125.508

The D2d #2 structure is derived from either D4h structure by allowing the hydrogen torsions to vary. Two extra dummy atoms are added to define the opposite direction for a C2 axis to help with the hydrogen torsion definitions, and a second C2 axis to help define the oxygen positions.

The D2d #1 structure is derived from the D4h #2 structure by allowing the hydrogen torsions to vary and the oxygen atoms to move out of the symmetry plane (initial O1CuX=80.0). Two extra dummy atoms are added to define the opposite direction for a C2 axis to help with the hydrogen torsion definitions, and a second C2 axis to help define the oxygen positions.

*CuAq4_+_D2d #2*

Cu

X*1 Cu 1.0

X*3 Cu 1.0 X*1 90.0

X*2 Cu 1.0 X*3 90.0 X*1 180.0

O1 Cu O1Cu X*1 90.0 X*3 0.0

H1A O1 H1AO Cu H1AOCu X*1 H1AOCuX

H1B O1 H1AO Cu H1AOCu X*2 H1AOCuX

O2 Cu O1Cu X*2 90.0 X*3 90.0

H2A O2 H1AO Cu H1AOCu X*1 -H1AOCuX

H2B O2 H1AO Cu H1AOCu X*2 -H1AOCuX

O3 Cu O1Cu X*1 90.0 X*3 180.0

H3A O3 H1AO Cu H1AOCu X*1 H1AOCuX

H3B O3 H1AO Cu H1AOCu X*2 H1AOCuX

O4 Cu O1Cu X*2 90.0 X*3 -90.0

H4A O4 H1AO Cu H1AOCu X*1 -H1AOCuX

H4B O4 H1AO Cu H1AOCu X*2 -H1AOCuX

O1Cu= 2.16708 2.05722 2.16525 2.17957

H1AO= 0.94979 0.97279 0.97423 0.97077

H1AOCu= 127.294 127.911 127.347 127.020

H1AOCuX= 73.707 64.619 52.756 47.054

*CuAq4_+_D2d #1*

Cu

X*1 Cu 1.0

X*3 Cu 1.0 X*1 90.0

X*2 Cu 1.0 X*3 90.0 X*1 180.0

O1 Cu O1Cu X*1 O1CuX X*3 0.0

H1A O1 H1AO Cu H1AOCu X*1 H1AOCuX

H1B O1 H1AO Cu H1AOCu X*1 -H1AOCuX

O2 Cu O1Cu X*2 O1CuX X*3 90.0

H2A O2 H1AO Cu H1AOCu X*2 H1AOCuX

H2B O2 H1AO Cu H1AOCu X*2 -H1AOCuX

O3 Cu O1Cu X*1 O1CuX X*3 180.0

H3A O3 H1AO Cu H1AOCu X*1 H1AOCuX

H3B O3 H1AO Cu H1AOCu X*1 -H1AOCuX

O4 Cu O1Cu X*2 O1CuX X*3 -90.0

H4A O4 H1AO Cu H1AOCu X*2 H1AOCuX

H4B O4 H1AO Cu H1AOCu X*2 -H1AOCuX

O1Cu= 2.13749 2.23052 2.03291 2.12034 2.14425

H1AO= 0.95005 0.95056 0.97258 0.97486 0.97114

O1CuX= 58.373 58.435 63.959 62.589 60.133

H1AOCu= 126.199 125.717 125.014 122.322 122.559

H1AOCuX= 82.248 80.872 75.520 70.541 71.548

The C4v #1 structure is derived from the D4h #2 structure by allowing the hydrogen torsions to vary and the oxygen atoms to move out of the symmetry plane (initial O1CuX=80.0). An extra dummy atom is added to help define the oxygen positions.

The D2h #3 structure is derived from the D4h #2 structure by making a trans pair of oxygen atoms and their hydrogens different from the other pair. The structure is then perturbed along the Cu-O distance.

*CuAq4_+_C4v #1*

Cu

X*1 Cu 1.0

X*3 Cu 1.0 X*1 90.0

O1 Cu O1Cu X*1 O1CuX X*3 0.0

H1A O1 H1AO Cu H1AOCu X*1 H1AOCuX

H1B O1 H1AO Cu H1AOCu X*1 -H1AOCuX

O2 Cu O1Cu X*1 O1CuX X*3 90.0

H2A O2 H1AO Cu H1AOCu X*1 H1AOCuX

H2B O2 H1AO Cu H1AOCu X*1 -H1AOCuX

O3 Cu O1Cu X*1 O1CuX X*3 180.0

H3A O3 H1AO Cu H1AOCu X*1 H1AOCuX

H3B O3 H1AO Cu H1AOCu X*1 -H1AOCuX

O4 Cu O1Cu X*1 O1CuX X*3 -90.0

H4A O4 H1AO Cu H1AOCu X*1 H1AOCuX

H4B O4 H1AO Cu H1AOCu X*1 -H1AOCuX

O1Cu= 2.16817 2.05757

H1AO= 0.94973 0.97283

O1CuX= 83.167 80.485

H1AOCu= 127.318 127.753

H1AOCuX= 91.360 95.624

*CuAq4_+_D2h #3*

Cu

X*1 Cu 1.0

O1 Cu O1Cu X*1 90.0

H1A O1 H1AO Cu H1AOCu X*1 90.0

H1B O1 H1AO Cu H1AOCu X*1 -90.0

O2 Cu O2Cu X*1 90.0 O1 90.0

H2A O2 H2AO Cu H2AOCu X*1 90.0

H2B O2 H2AO Cu H2AOCu X*1 -90.0

O3 Cu O1Cu X*1 90.0 O1 180.0

H3A O3 H1AO Cu H1AOCu X*1 90.0

H3B O3 H1AO Cu H1AOCu X*1 -90.0

O4 Cu O2Cu X*1 90.0 O1 -90.0

H4A O4 H2AO Cu H2AOCu X*1 90.0

H4B O4 H2AO Cu H2AOCu X*1 -90.0

Initial

O1Cu= 2.05572+0.1 2.29001 2.41826 2.42038

H1AO= 0.97283 0.97347 0.97460 0.97131

O2Cu= 2.05572-0.1 1.89444 1.98967 2.01888

H2AO= 0.97283 0.97138 0.97356 0.96993

H1AOCu= 128.043 128.676 128.098 127.837

H2AOCu= 128.043 126.981 126.781 126.512

The C4h #1 structure only has one additional parameter, the hydrogen torsion, and can be derived from the D4h #1 structure by adding a second dummy atom opposite to the first one and referencing the appropriate hydrogen torsion to the appropriate dummy atom. The initial torsion was set to 20 degrees.

The D2d #3 structure is derived from D4h #1 by allowing the oxygens to deviate from the plane. The two hydrogens on each oxygen atom then become inequivalent. Initial O1CuX=80.

*CuAq4_+_C4h #1*

Cu

X*1 Cu 1.0

O1 Cu O1Cu X*1 90.0

X*2 Cu 1.0 O1 90.0 X*1 180.0

H1A O1 H1AO Cu H1AOCu X*1 H1AOCuX

H1B O1 H1AO Cu H1AOCu X*2 -H1AOCuX

O2 Cu O1Cu X*1 90.0 O1 90.0

H2A O2 H1AO Cu H1AOCu X*1 H1AOCuX

H2B O2 H1AO Cu H1AOCu X*2 -H1AOCuX

O3 Cu O1Cu X*1 90.0 O1 180.0

H3A O3 H1AO Cu H1AOCu X*1 H1AOCuX

H3B O3 H1AO Cu H1AOCu X*2 -H1AOCuX

O4 Cu O1Cu X*1 90.0 O1 -90.0

H4A O4 H1AO Cu H1AOCu X*1 H1AOCuX

H4B O4 H1AO Cu H1AOCu X*2 -H1AOCuX

O1Cu= 2.18100 2.27682 2.07741 2.17061 2.18889

H1AO= 0.95023 0.95053 0.97384 0.97575 0.97232

H1AOCu= 124.019 123.410 119.726 117.630 117.379

H1AOCuX= 16.015 16.943 24.840 26.864 26.715

*CuAq4_+_D2d #3*

Cu

X*1 Cu 1.0

X*3 Cu 1.0 X*1 90.0

X*2 Cu 1.0 X*3 90.0 X*1 180.0

O1 Cu O1Cu X*1 O1CuX X*3 0.0

H1A O1 H1AO Cu H1AOCu X*1 0.0

H1B O1 H1BO Cu H1BOCu X*1 180.0

O2 Cu O1Cu X*2 O1CuX X*3 90.0

H2A O2 H1AO Cu H1AOCu X*2 0.0

H2B O2 H1BO Cu H1BOCu X*2 180.0

O3 Cu O1Cu X*1 O1CuX X*3 180.0

H3A O3 H1AO Cu H1AOCu X*1 0.0

H3B O3 H1BO Cu H1BOCu X*1 180.0

O4 Cu O1Cu X*2 O1CuX X*3 -90.0

H4A O4 H1AO Cu H1AOCu X*2 0.0

H4B O4 H1BO Cu H1BOCu X*2 180.0

O1Cu= 2.13886 2.23224 2.03418 2.11596 2.14027

H1AO= 0.94992 0.95031 0.97231 0.97389 0.97055

H1BO= 0.95013 0.95056 0.97208 0.97406 0.97066

O1CuX= 55.289 55.406 61.248 57.913 57.384

H1AOCu= 130.394 129.831 131.8123 130.389 130.218

H1BOCu= 123.400 123.522 122.951 123.343 123.126

The D2h #2 structure is derived from D4h #1 by making a trans pair of oxygen atoms and their hydrogens different from the other pair. The structure is then perturbed along the Cu-O distance.

The C4v #2 structure is derived from the D4h #1 structure by allowing the hydrogen atoms on each oxygen to become nonequivalent and the oxygen atoms to move out of the symmetry plane (initial O1CuX=100.0).

*CuAq4_+_D2h #2*

Cu

X*1 Cu 1.0

O1 Cu O1Cu X*1 90.0

H1A O1 H1AO Cu H1AOCu X*1 0.0

H1B O1 H1AO Cu H1AOCu X*1 180.0

O2 Cu O2Cu X*1 90.0 O1 90.0

H2A O2 H2AO Cu H2AOCu X*1 0.0

H2B O2 H2AO Cu H2AOCu X*1 180.0

O3 Cu O1Cu X*1 90.0 O1 180.0

H3A O3 H1AO Cu H1AOCu X*1 0.0

H3B O3 H1AO Cu H1AOCu X*1 180.0

O4 Cu O2Cu X*1 90.0 O1 -90.0

H4A O4 H2AO Cu H2AOCu X*1 0.0

H4B O4 H2AO Cu H2AOCu X*1 180.0

Initial

O1Cu= 2.0757-0.1 1.89858 2.00062 2.05687

H1AO= 0.9727 0.97155 0.97365 0.97027

O2Cu= 2.0757+0.1 2.33313 2.39408 2.34702

H2AO= 0.9727 0.97304 0.97428 0.97099

H1AOCu= 127.51 126.744 126.576 126.390

H2AOCu= 127.51 128.006 127.488 127.137

*CuAq4_+_C4v #2*

Cu

X*1 Cu 1.0

O1 Cu O1Cu X*1 O1CuX

H1A O1 H1AO Cu H1AOCu X*1 0.0

H1B O1 H1BO Cu H1BOCu X*1 180.0

O2 Cu O1Cu X*1 O1CuX O1 90.0

H2A O2 H1AO Cu H1AOCu X*1 0.0

H2B O2 H1BO Cu H1BOCu X*1 180.0

O3 Cu O1Cu X*1 O1CuX O1 180.0

H3A O3 H1AO Cu H1AOCu X*1 0.0

H3B O3 H1BO Cu H1BOCu X*1 180.0

O4 Cu O1Cu X*1 O1CuX O1 -90.0

H4A O4 H1AO Cu H1AOCu X*1 0.0

H4B O4 H1BO Cu H1BOCu X*1 180.0

O1Cu= 2.07572 2.07575

H1AO= 0.97267 0.97275

H1BO= 0.97267 0.97261

H1AOCu= 127.512 127.836

H1BOCu= 127.512 127.193

O1CuX= 100.0 91.775

The C2v #1 structure is derived from D4h #1 by making a pair of oxygen atoms along the symmetry axis inequivalent and the other two equivalent to each other. The hydrogen atom are allowed to wag as well to perturb the system (H2AOCuO=80.0).

*CuAq4_+_C2v #1*

Cu

X*1 Cu 1.0

O1 Cu O1Cu X*1 90.0

H1A O1 H1AO Cu H1AOCu X*1 0.0

H1B O1 H1AO Cu H1AOCu X*1 180.0

O2 Cu O2Cu O1 O2CuO X*1 90.0

H2A O2 H2AO Cu H2AOCu O1 H2AOCuO

H2B O2 H2AO Cu H2AOCu O1 -H2AOCuO

O3 Cu O3Cu X*1 90.0 O1 180.0

H3A O3 H3AO Cu H3AOCu X*1 0.0

H3B O3 H3AO Cu H3AOCu X*1 180.0

O4 Cu O2Cu O1 O2CuO X*1 -90.0

H4A O4 H2AO Cu H2AOCu O1 H2AOCuO

H4B O4 H2AO Cu H2AOCu O1 -H2AOCuO

O1Cu= 2.0756 3.05377 2.84621

H1AO= 0.9727 0.97183 0.97487

O2Cu= 2.0756 1.89099 1.96654

H2AO= 0.9727 0.97464 0.97611

O3Cu= 2.0756 2.13647 2.25324

H3AO= 0.9727 0.97334 0.97435

H1AOCu= 127.51 128.322 127.962

O2CuO= 90.0 78.200 82.860

H2AOCu= 127.51 114.552 116.037

H3AOCu= 127.51 127.600 127.236

H2AOCuO= 80.0 60.132 61.936

1. Starting with HF/STO-3G, guess=read at all other levels [↑](#footnote-ref-1)
2. Starting with HF/STO-3G Stable=Opt, guess=read and Stable=Opt at all other levels. Default (RHF) initially assumed, RHF takes alpha-orbital guess from previous calculation if UHF. [↑](#footnote-ref-2)
3. Starting with HF/STO-3G SCF=DSymm Stable=Opt, guess=read at all other levels [↑](#footnote-ref-3)
4. Starting with HF/3-21G Stable=Opt, guess=read and Stable=Opt at all other levels. Required SCF=XQC for convergence. [↑](#footnote-ref-4)
5. Starting with HF/3-21G SCF=XQC, guess=read at all other levels. [↑](#footnote-ref-5)
6. Starting with HF/STO-3G, guess=read at all other levels [↑](#footnote-ref-6)
7. Starting with HF/STO-3G Stable=Opt, guess=read and Stable=Opt at all other levels. Default (RHF) initially assumed, RHF takes alpha-orbital guess from previous calculation if UHF. [↑](#footnote-ref-7)
8. Starting with HF/3-21G SCF=XQC, guess=read at all other levels. [↑](#footnote-ref-8)
9. Starting with HF/3-21G SCF=XQC, guess=read at all other levels. [↑](#footnote-ref-9)
